# Supplementary material for: Shotgun proteomics and network analysis of neuroblastoma cell lines treated with curcumin
Source: Royal Society of Chemistry journal article supplement (doi:10.1039/c2mb05498a), 2012-01-17
Supplement: c2mb05498a_2.pdf [file c2mb05498a_2.pdf]

**Table 1S. Differential proteins identified by shogun analysis in WT experiment: proteins details**

| Accession | Protein Name                              | Score   | Protein avgMass | Matched Peptides | Seq. Cover(%) |
|-----------|-------------------------------------------|---------|-----------------|------------------|---------------|
| P0CG48    | Polyubiquitin-C                           | 1000.29 | 77028           | 13               | 18.98         |
| P08107    | Heat shock 70 kDa protein 1A/1B           | 2548.45 | 70052           | 37               | 58.19         |
| P17066    | Heat shock 70 kDa protein 6               | 1085.71 | 71028           | 13               | 24.42         |
| P34931    | Heat shock 70 kDa protein 1-like          | 1132.96 | 70375           | 15               | 36.51         |
| P50914    | 60S ribosomal protein L14                 | 244.22  | 23431           | 6                | 26.51         |
| Q92841    | Probable ATP-dependent RNA helicase DDX17 | 432.12  | 72371           | 17               | 24.46         |
| P60842    | Eukaryotic initiation factor 4A-I         | 573.21  | 46154           | 14               | 36.45         |
| P08729    | Keratin                                   | 382.57  | 51404           | 13               | 27.72         |
| P17844    | Probable ATP-dependent RNA helicase DDX5  | 391.96  | 69148           | 10               | 17.1          |
| P61978    | Heterogeneous nuclear ribonucleoprotein K | 374.52  | 50976           | 11               | 30.02         |
| P25398    | 40S ribosomal protein S12                 | 145.68  | 14515           | 4                | 34.09         |
| P46781    | 40S ribosomal protein S9                  | 204.2   | 22591           | 4                | 18.04         |
| P62269    | 40S ribosomal protein S18                 | 187.35  | 17718           | 7                | 34.87         |
| P09923    | Intestinal-type alkaline phosphatase      | 368.98  | 56812           | 18               | 39.02         |
| Q14240    | Eukaryotic initiation factor 4A-II        | 385.24  | 46402           | 13               | 27.52         |
| P19338    | Nucleolin                                 | 237.52  | 76614           | 12               | 20.99         |
| P32119    | Peroxiredoxin-2                           | 123.92  | 21891           | 4                | 24.75         |
| P0CG39    | POTE ankyrin domain family member J       | 600.11  | 117390          | 5                | 4.34          |
| A5A3E0    | POTE ankyrin domain family member F       | 876.37  | 121445          | 11               | 14.98         |
| Q05639    | Elongation factor 1-alpha 2               | 737.74  | 50470           | 11               | 20.3          |
| P04075    | Fructose-bisphosphate aldolase A          | 640.35  | 39420           | 18               | 61.81         |
| P27348    | 14-3-3 protein theta                      | 276.87  | 27764           | 6                | 19.18         |
| P61981    | 14-3-3 protein gamma                      | 247.94  | 28302           | 4                | 22.67         |
| Q06830    | Peroxiredoxin-1                           | 578.53  | 22110           | 16               | 76.88         |
| P26641    | Elongation factor 1-gamma                 | 456.89  | 50118           | 11               | 24.49         |
| Q04917    | 14-3-3 protein eta                        | 261.8   | 28218           | 8                | 33.74         |
| P68104    | Elongation factor 1-alpha 1               | 1333.68 | 50140           | 21               | 48.48         |
| Q5VTE0    | Putative elongation factor 1-alpha-like 3 | 1338.84 | 50185           | 24               | 40.91         |
| P61247    | 40S ribosomal protein S3a                 | 272.81  | 29945           | 7                | 21.97         |
| P31947    | 14-3-3 protein sigma                      | 241.99  | 27774           | 3                | 11.69         |
| P14618    | Pyruvate kinase isozymes M1/M2            | 961.27  | 57937           | 30               | 59.32         |
| P23396    | 40S ribosomal protein S3                  | 230.33  | 26688           | 11               | 53.5          |
| P62258    | 14-3-3 protein epsilon                    | 281.05  | 29173           | 11               | 30.59         |
| P07195    | L-lactate dehydrogenase B chain           | 603.47  | 36638           | 20               | 45.51         |

|        |                                              |         |        |    |       |
|--------|----------------------------------------------|---------|--------|----|-------|
| P30041 | Peroxiredoxin-6                              | 372.92  | 25035  | 12 | 50.45 |
| P05388 | 60S acidic ribosomal protein P0              | 220.42  | 34273  | 8  | 36.28 |
| P62826 | GTP-binding nuclear protein Ran              | 363.4   | 24423  | 10 | 43.98 |
| P68366 | Tubulin alpha-4A chain                       | 684.2   | 49924  | 16 | 44.2  |
| Q9H4B7 | Tubulin beta-1 chain                         | 370.46  | 50327  | 7  | 17.07 |
| P62277 | 40S ribosomal protein S13                    | 319.93  | 17222  | 10 | 42.38 |
| O43707 | Alpha-actinin-4                              | 605.77  | 104854 | 22 | 31.06 |
| P13639 | Elongation factor 2                          | 1511.06 | 95338  | 40 | 50.12 |
| P06733 | Alpha-enolase                                | 1130.42 | 47169  | 24 | 60.37 |
| P00338 | L-lactate dehydrogenase A chain              | 639.13  | 36688  | 25 | 65.06 |
| P63104 | 14-3-3 protein zeta/delta                    | 282.6   | 27745  | 6  | 29.8  |
| P08865 | 40S ribosomal protein SA                     | 231.75  | 32854  | 10 | 32.88 |
| P62937 | Peptidyl-prolyl cis-trans isomerase A        | 334.18  | 18012  | 13 | 73.33 |
| P37802 | Transgelin-2                                 | 264.15  | 22391  | 9  | 58.29 |
| P29401 | Transketolase                                | 646.79  | 67877  | 19 | 34.51 |
| P00558 | Phosphoglycerate kinase 1                    | 598.16  | 44614  | 17 | 51.56 |
| P04406 | Glyceraldehyde-3-phosphate dehydrogenase     | 1155.01 | 36053  | 14 | 42.69 |
| P12814 | Alpha-actinin-1                              | 555.11  | 103057 | 12 | 18.61 |
| P23528 | Cofilin-1                                    | 231.84  | 18502  | 10 | 62.65 |
| Q9BUF5 | Tubulin beta-6 chain                         | 512.79  | 49857  | 5  | 14.57 |
| P60174 | Triosephosphate isomerase                    | 458.65  | 26669  | 13 | 52.61 |
| P07437 | Tubulin beta chain                           | 1185.08 | 49670  | 22 | 61.94 |
| P00966 | Argininosuccinate synthase                   | 300.61  | 46530  | 14 | 43.93 |
| Q16719 | Kynureninase                                 | 276.31  | 52351  | 10 | 21.08 |
| P10599 | Thioredoxin                                  | 239.87  | 11737  | 5  | 29.52 |
| P07197 | Neurofilament medium polypeptide             | 534.22  | 102472 | 13 | 13.86 |
| P09601 | Heme oxygenase 1                             | 222.68  | 32818  | 7  | 33.68 |
| O00410 | Importin-5                                   | 441.06  | 123630 | 18 | 22.33 |
| P13804 | Electron transfer flavoprotein subunit alpha | 158.58  | 35079  | 8  | 31.83 |
| P62158 | Calmodulin                                   | 218.23  | 16837  | 3  | 31.54 |
| P30086 | Phosphatidylethanolamine-binding protein 1   | 206.94  | 21056  | 8  | 47.59 |
| P08708 | 40S ribosomal protein S17                    | 135.99  | 15550  | 7  | 55.56 |
