# Supplementary material for: Shotgun proteomics and network analysis of neuroblastoma cell lines treated with curcumin
Source: Royal Society of Chemistry journal article supplement (doi:10.1039/c2mb05498a), 2012-01-17
Supplement: c2mb05498a_3.pdf [file c2mb05498a_3.pdf]

**Table 2S. Differential proteins identified by shogun analysis in WT experiment: peptide details**

| Accession <sup>a</sup> | protein name <sup>b</sup> | modification <sup>c</sup> | sequence <sup>d</sup>           | start <sup>e</sup>              | Length <sup>f</sup> | score <sup>g</sup> | z <sup>h</sup> | m/z <sup>i</sup> |           |          |
|------------------------|---------------------------|---------------------------|---------------------------------|---------------------------------|---------------------|--------------------|----------------|------------------|-----------|----------|
| P0CG48                 | Polyubiquitin-C           |                           | TLSDYNIQK                       | 586                             | 9                   | 108.35             | 2              | 541.282          |           |          |
|                        |                           |                           | ESTLHLVLR                       | 671                             | 9                   | 124.08             | 2              | 534.315          |           |          |
|                        |                           |                           | TITLEVEPSDTIENVK                | 239                             | 16                  | 264.4              | 2              | 894.4726         |           |          |
|                        |                           |                           | IQDKEGIPDQQR                    | 257                             | 13                  | 88.92              | 3              | 508.5963         |           |          |
|                        |                           |                           | EGIPDQQR                        | 489                             | 9                   | 48.21              | 2              | 520.2624         |           |          |
|                        |                           |                           | LIFAGK                          | 118                             | 6                   | 56.22              | 1              | 648.4062         |           |          |
|                        |                           |                           | QIFVK                           | 1                               | 5                   | 55.88              | 1              | 634.3908         |           |          |
|                        |                           |                           | IQDK                            | 181                             | 4                   | 13.63              | 1              | 503.2872         |           |          |
|                        |                           |                           | TITLEVEPSDTIENVK                | 163                             | 16                  | 26.42              | 3              | 596.6549         |           |          |
|                        |                           |                           | IQDKEGIPDQQR                    | 637                             | 13                  | 78.77              | 3              | 508.6005         |           |          |
|                        |                           |                           | TLSDYNIQKESTLHLVLR              | 586                             | 18                  | 58.54              | 4              | 533.300          |           |          |
|                        |                           |                           | TLTGKTITLEVEPSDTIENVK           | 310                             | 21                  | 26.7               | 3              | 763.4107         |           |          |
|                        |                           |                           | TLSDYNIQKESTLHLVLR              | 586                             | 18                  | 17.01              | 3              | 737.3748         |           |          |
|                        |                           | P08107                    | Heat shock 70 kDa protein 1A/1B |                                 | VEIANDQGNR          | 25                 | 11             | 186.66           | 2         | 614.8208 |
|                        |                           |                           |                                 |                                 | TTPSYVAFTDTER       | 36                 | 13             | 187.51           | 2         | 744.3601 |
|                        |                           |                           |                                 |                                 | ATAGDTHLGGEDFDNR    | 220                | 16             | 105.26           | 3         | 559.2482 |
|                        | HWPFQVINDGDKPK            |                           |                                 | 88                              | 14                  | 83.82              | 3              | 560.9522         |           |          |
|                        | IINEPTAAAIAYGLDR          |                           |                                 | 171                             | 16                  | 220.44             | 2              | 844.4579         |           |          |
|                        | LLQDFNGR                  |                           |                                 | 348                             | 9                   | 108.35             | 2              | 555.2911         |           |          |
|                        | DAGVIAGLNVLR              |                           |                                 | 159                             | 12                  | 165.25             | 2              | 599.3528         |           |          |
|                        | LVNHFVEEFK                |                           |                                 | 236                             | 10                  | 127.43             | 3              | 421.2192         |           |          |
|                        | NALESYAFNMK               |                           |                                 | 539                             | 11                  | 147.93             | 2              | 644.3094         |           |          |
|                        | FGDPVVQSDMK               |                           |                                 | 77                              | 11                  | 150.94             | 2              | 611.7972         |           |          |
|                        | NQVALNPQNTVFDAK           |                           |                                 | 56                              | 15                  | 230.1              | 2              | 829.932          |           |          |
|                        | Carbamidomethyl+C(5)      |                           |                                 | FEELCSDLFR                      | 301                 | 10                 | 106.47         | 2                | 658.3069  |          |
|                        | STLEPVEK                  |                           |                                 | 311                             | 8                   | 98.81              | 2              | 451.7456         |           |          |
|                        | SAVEDEGLK                 |                           |                                 | 550                             | 9                   | 93.13              | 2              | 474.2385         |           |          |
|                        | Carbamidomethyl+C(1)      |                           |                                 | CQEVISWLDANTLAEKDEFEHK          | 573                 | 22                 | 85.5           | 4                | 666.3156  |          |
|                        | AQIHDLVLVGGSTR            |                           |                                 | 328                             | 14                  | 174.67             | 3              | 489.2741         |           |          |
|                        | LSKEEIER                  |                           |                                 | 509                             | 8                   | 42.93              | 2              | 502.273          |           |          |
|                        | Carbamidomethyl+C(14)     |                           |                                 | AAAIGIDLGTTYSCVGVFQHGK          | 3                   | 22                 | 95.4           | 3                | 755.7218  |          |
|                        | Carbamidomethyl+C(6)      |                           |                                 | ELEQVCNPIISGLYQGAGGPGGGFGAQQGPK | 597                 | 31                 | 77.64          | 3                | 1019.1778 |          |
|                        |                           |                           |                                 | QTQIFTTYSNQPGLVLIQVYEGER        | 423                 | 24                 | 39.44          | 3                | 929.4662  |          |

|                       |                                  |                      |                                |     |          |        |   |           |
|-----------------------|----------------------------------|----------------------|--------------------------------|-----|----------|--------|---|-----------|
| P17066                | Heat shock 70 kDa protein 6      | Carbamidomethyl+C(5) | EIAEAYLGYPVTNAVITVPA YFNDSQR   | 128 | 27       | 67.02  | 3 | 1001.1785 |
|                       |                                  |                      | SINPDEAVAYGAAVQAAILMGDK        | 361 | 23       | 77.57  | 3 | 768.7279  |
|                       |                                  |                      | FELSGIPPAPR                    | 458 | 11       | 39.35  | 2 | 592.3334  |
|                       |                                  |                      | MKEIAEAYLGYPVTNAVITVPA YFNDSQR | 126 | 29       | 18.39  | 3 | 1087.5551 |
|                       |                                  |                      | NQVALNPQNTVFDAKR               | 56  | 16       | 18.72  | 3 | 605.6606  |
|                       |                                  |                      | VQVSYK                         | 102 | 6        | 42.25  | 2 | 362.2049  |
|                       |                                  |                      | DISQNK                         | 251 | 6        | 14.31  | 2 | 352.6783  |
|                       |                                  |                      | YKAEDEVQR                      | 524 | 9        | 80.41  | 2 | 569.2831  |
|                       |                                  |                      | KFGDPVVQSDMK                   | 76  | 12       | 99.37  | 2 | 675.8471  |
|                       |                                  |                      | LVNHFVEEFKR                    | 236 | 11       | 59.34  | 3 | 473.2528  |
|                       |                                  |                      | SKEEIER                        | 510 | 7        | 1.02   | 2 | 445.7309  |
|                       |                                  |                      | VEDEGLK                        | 552 | 7        | 1.37   | 1 | 789.4025  |
|                       |                                  |                      | QDFFNDR                        | 350 | 7        | 9.31   | 2 | 442.2097  |
|                       |                                  |                      | TLEPVEK                        | 312 | 7        | 1.02   | 2 | 408.2303  |
|                       |                                  |                      | ALNPQNTVFDAKR                  | 59  | 13       | 3.76   | 2 | 737.3959  |
|                       |                                  |                      | IAGLNVLK                       | 163 | 8        | 2.39   | 1 | 855.5504  |
|                       |                                  |                      | NDGDKPK                        | 95  | 7        | 7.5    | 1 | 773.3806  |
|                       |                                  |                      | TTPSYVAFTDTER                  | 38  | 13       | 187.51 | 2 | 744.3601  |
|                       |                                  |                      | ATAGDTHLGGEDFDNR               | 222 | 16       | 105.26 | 3 | 559.2482  |
|                       |                                  |                      | IINEPTAAAIA YGLDR              | 173 | 16       | 220.44 | 2 | 844.4579  |
|                       |                                  |                      | FEELCSDLFR                     | 303 | 10       | 106.47 | 2 | 658.3069  |
|                       |                                  |                      | STLEPVEK                       | 313 | 8        | 98.81  | 2 | 451.7456  |
|                       |                                  |                      | LLQDFNKG                       | 350 | 9        | 93.13  | 2 | 541.2868  |
|                       |                                  |                      | HAVITVPA YFNDSQR               | 142 | 15       | 67.49  | 3 | 573.2941  |
|                       |                                  |                      | DAGAIAGLNVLK                   | 161 | 12       | 42.83  | 2 | 585.3393  |
|                       |                                  |                      | ETA EAYLGQPVK                  | 130 | 12       | 24.09  | 2 | 653.3443  |
| FELSGIPPAPR           | 460                              | 11                   | 39.35                          | 2   | 592.3334 |        |   |           |
| EVLAWLEHNQLAEKEEYEHQK | 577                              | 21                   | 15.12                          | 4   | 656.578  |        |   |           |
| AQHDDVVLVGGSTR        | 330                              | 14                   | 20.97                          | 2   | 726.4092 |        |   |           |
| STLEPVEK              | 313                              | 8                    | 1.02                           | 2   | 442.7403 |        |   |           |
| VEIANDQGNR            | 27                               | 11                   | 186.66                         | 2   | 614.8208 |        |   |           |
| TTPSYVAFTDTER         | 38                               | 13                   | 187.51                         | 2   | 744.3601 |        |   |           |
| ATAGDTHLGGEDFDNR      | 222                              | 16                   | 105.26                         | 3   | 559.2482 |        |   |           |
| DAGVIAGLNVLK          | 161                              | 12                   | 165.25                         | 2   | 599.3528 |        |   |           |
| NALESYAFNMK           | 541                              | 11                   | 147.93                         | 2   | 644.3094 |        |   |           |
| IINEPTAAAIA YGLDK     | 173                              | 16                   | 101.7                          | 2   | 830.4587 |        |   |           |
| LSKEEIER              | 511                              | 8                    | 42.93                          | 2   | 502.273  |        |   |           |
| P34931                | Heat shock 70 kDa protein 1-like |                      |                                |     |          |        |   |           |

|        |                                           |                      |                              |     |    |        |   |          |
|--------|-------------------------------------------|----------------------|------------------------------|-----|----|--------|---|----------|
|        |                                           |                      | QTQIFTTYSNQPGLVLIQVYEGER     | 425 | 24 | 39.44  | 3 | 929.4662 |
|        |                                           |                      | SINPDEAVAYGAAVQAAILMGDK      | 363 | 23 | 77.57  | 3 | 768.7279 |
|        |                                           |                      | LVSHFVEEFKR                  | 238 | 11 | 44.12  | 3 | 464.25   |
|        |                                           |                      | AFYPPEISSMVLTK               | 114 | 14 | 134.18 | 2 | 807.9203 |
|        |                                           |                      | IHDIVLVGGSTR                 | 332 | 12 | 31.29  | 3 | 422.9159 |
|        |                                           |                      | GVPQIEVTFDIDANGILNVTATDK     | 471 | 24 | 24.05  | 3 | 844.1203 |
|        |                                           | Carbamidomethyl+C(6) | ELEQMCNPIITK                 | 599 | 12 | 28.07  | 2 | 738.3609 |
|        |                                           |                      | ETAEAFLGHPVTNAVITVPAAYFNDSQR | 130 | 27 | 12.77  | 4 | 737.6206 |
| P50914 | 60S ribosomal protein L14                 |                      | LVAIVDVIDQNR                 | 23  | 12 | 99.37  | 2 | 677.895  |
|        |                                           | Carbamidomethyl+C(1) | CMQLTDFILK                   | 53  | 10 | 55.99  | 2 | 634.829  |
|        |                                           | Carbamidomethyl+C(7) | ALVDGPCTQVR                  | 35  | 11 | 53.15  | 2 | 608.3177 |
|        |                                           |                      | VAYVSFGPHAGK                 | 11  | 12 | 36.81  | 3 | 411.5504 |
|        |                                           |                      | MTDFDR                       | 103 | 6  | 14.31  | 2 | 392.6706 |
|        |                                           |                      | FVEVGRVAYVSFGPHAGK           | 5   | 18 | 17.01  | 2 | 960.5017 |
| Q92841 | Probable ATP-dependent RNA helicase DDX17 |                      | APILIATDVASR                 | 389 | 12 | 118.11 | 2 | 613.8616 |
|        |                                           | Carbamidomethyl+C(6) | GDGPICLVLPTR                 | 162 | 13 | 27.16  | 2 | 684.876  |
|        |                                           | Carbamidomethyl+C(3) | STCIYGGAPK                   | 195 | 10 | 35.83  | 2 | 527.2592 |
|        |                                           |                      | NFYVEHPEVAR                  | 53  | 11 | 71.9   | 3 | 454.2248 |
|        |                                           |                      | LIDFLESGK                    | 225 | 9  | 32.48  | 2 | 511.2846 |
|        |                                           |                      | GTAYTFFTPGNLK                | 436 | 13 | 27.16  | 2 | 708.8597 |
|        |                                           |                      | QTLMWSATWPK                  | 271 | 11 | 33.16  | 2 | 674.8478 |
|        |                                           |                      | GLDVEDVK                     | 401 | 8  | 42.93  | 2 | 437.7347 |
|        |                                           |                      | LIQLMEEIMAEK                 | 326 | 12 | 50.48  | 2 | 724.3929 |
|        |                                           |                      | VLEEANQAINPK                 | 456 | 12 | 36.81  | 2 | 663.3567 |
|        |                                           |                      | DMVGIAQTGSGK                 | 130 | 12 | 31.29  | 3 | 388.5228 |
|        |                                           |                      | QLAEDFLR                     | 285 | 8  | 38.16  | 3 | 331.1744 |
|        |                                           |                      | LMQLVDHRGGGGGGGGR            | 468 | 17 | 25.17  | 3 | 541.9378 |
|        |                                           |                      | WDLSELPKFEK                  | 42  | 11 | 40.94  | 2 | 696.3643 |
|        |                                           | Oxidation+M(5)       | LIQLMEEIMAEK                 | 326 | 12 | 36.81  | 2 | 732.3729 |
|        |                                           |                      | NFYVEHPEVA                   | 53  | 10 | 2.05   | 2 | 602.7801 |
|        |                                           |                      | LIDFLESG                     | 225 | 8  | 1.37   | 2 | 447.2381 |
| P60842 | Eukaryotic initiation factor 4A-I         |                      | LQMEAPHIIVGTPGR              | 146 | 15 | 90.41  | 3 | 540.2966 |
|        |                                           |                      | VLITDLLAR                    | 324 | 10 | 78.53  | 2 | 557.847  |
|        |                                           |                      | GIYAYGFEEKPSAIQQR            | 45  | 16 | 106.47 | 3 | 609.9872 |
|        |                                           |                      | ATQALVLAPTR                  | 99  | 11 | 136.97 | 2 | 570.8445 |
|        |                                           |                      | VFDMLNR                      | 161 | 7  | 67.52  | 2 | 447.7308 |
|        |                                           |                      | GYDVIAQAQSGTGK               | 68  | 14 | 20.97  | 2 | 697.857  |

|        |                                           |                          |            |     |        |      |           |           |
|--------|-------------------------------------------|--------------------------|------------|-----|--------|------|-----------|-----------|
|        |                                           | KEELTLEGIR               | 237        | 10  | 42.81  | 2    | 594.337   |           |
|        |                                           | LNSNTQVVLLSATMPSDVLEVTKK | 202        | 24  | 21.25  | 3    | 863.1458  |           |
|        |                                           | LNSNTQVVLLSATMPSDVLEVTK  | 202        | 23  | 14.17  | 3    | 820.4421  |           |
|        |                                           | GIDVQQVSLVINYDLPTNR      | 334        | 19  | 16.31  | 2    | 1072.5755 |           |
|        |                                           | DFTVSAMHGDMQK            | 295        | 14  | 20.97  | 3    | 527.8979  |           |
|        |                                           | ELAQQIQK                 | 110        | 8   | 42.93  | 2    | 479.2721  |           |
|        |                                           | VLLSATMPSDVLEVTKK        | 209        | 17  | 6.49   | 2    | 916.016   |           |
| P08729 | Keratin                                   | LQMEAPHII                | 146        | 9   | 3.41   | 2    | 526.2887  |           |
|        |                                           | FASFIDK                  | 101        | 7   | 67.52  | 2    | 414.2146  |           |
|        |                                           | LLEGEESR                 | 394        | 8   | 66.1   | 2    | 466.738   |           |
|        |                                           | LALDIEIATYR              | 382        | 11  | 74.1   | 2    | 639.3649  |           |
|        |                                           | FLEQQNK                  | 110        | 7   | 39.58  | 2    | 453.7354  |           |
|        |                                           | TLNNK                    | 96         | 5   | 27.94  | 1    | 589.3348  |           |
|        |                                           | SLDLDGIIAEVK             | 253        | 12  | 34.75  | 2    | 636.8644  |           |
|        |                                           | LQAEIDNIK                | 317        | 9   | 48.05  | 2    | 522.2956  |           |
|        |                                           | LPDIFEAQIAGLR            | 136        | 13  | 29.87  | 2    | 721.9108  |           |
|        |                                           | TAAENEFVVLK              | 187        | 11  | 29.19  | 2    | 610.8373  |           |
|        |                                           | GQLEALQVDGGR             | 149        | 12  | 24.09  | 2    | 621.8342  |           |
|        |                                           | SIHFSSPVFTSR             | 1          | 12  | 34.3   | 2    | 682.8421  |           |
|        |                                           | AKQEELEAALQR             | 351        | 12  | 36.81  | 3    | 462.5872  |           |
| P17844 | Probable ATP-dependent RNA helicase       | WTLLEQKSAK               | 122        | 11  | 26.18  | 3    | 444.5842  |           |
|        |                                           | APILIATDVASR             | 391        | 12  | 118.11 | 2    | 613.8616  |           |
|        | Carbamidomethyl+C(6)                      | GDGPICLVLAPTR            | 164        | 13  | 27.16  | 2    | 684.876   |           |
|        | Carbamidomethyl+C(3)                      | STCIYGGAPK               | 197        | 10  | 35.83  | 2    | 527.2592  |           |
|        |                                           | LLQLVEDR                 | 470        | 8   | 35.15  | 2    | 493.2871  |           |
|        |                                           | WNLDELPK                 | 45         | 8   | 38.16  | 2    | 507.7692  |           |
|        | Carbamidomethyl+C(14)                     | ELAQQVQQVAAEYCR          | 177        | 15  | 19.76  | 3    | 598.2879  |           |
|        |                                           | TTYLVLDEADR              | 241        | 11  | 26.18  | 2    | 648.324   |           |
|        |                                           | QLAEDFLK                 | 287        | 8   | 38.16  | 2    | 482.2676  |           |
|        |                                           | TLSYLLPAIVHINHQPFLER     | 144        | 20  | 15.68  | 3    | 787.7605  |           |
| P61978 | Heterogeneous nuclear ribonucleoprotein K | Carbamidomethyl+C(3)     | STCIYGGAPK | 197 | 10     | 1.71 | 1         | 1035.4958 |
|        |                                           | IILDISESPIK              | 207        | 12  | 143.04 | 2    | 670.9103  |           |
|        |                                           | NTDEMVELR                | 37         | 9   | 71.21  | 2    | 553.7667  |           |
|        | Carbamidomethyl+C(5);Carbamidomethyl+C(6) | LFQECCPHSTDR             | 179        | 12  | 34.3   | 3    | 517.2251  |           |
|        |                                           | RPAEDMEEEQAFKR           | 21         | 14  | 33.97  | 3    | 579.279   |           |
|        |                                           | IITITGTQDQIQNAQYLLQNSVK  | 433        | 23  | 80.24  | 3    | 863.8074  |           |
|        |                                           | GSYGDLGGPIITTVTIPK       | 377        | 19  | 23.26  | 4    | 480.0091  |           |

|        |                                      |                                            |                                |     |    |        |   |          |
|--------|--------------------------------------|--------------------------------------------|--------------------------------|-----|----|--------|---|----------|
|        |                                      |                                            | LLIHQSLAGGIIGVK                | 148 | 15 | 55.48  | 3 | 506.9834 |
|        |                                      |                                            | IDEPLEGSEDR                    | 422 | 11 | 39.35  | 2 | 630.3005 |
|        |                                      |                                            | VVLIGGKPDR                     | 191 | 10 | 28.84  | 2 | 527.3311 |
|        |                                      |                                            | GPPPPPPGR                      | 287 | 9  | 68.2   | 2 | 436.2401 |
|        |                                      |                                            | MPPGR                          | 263 | 5  | 27.94  | 1 | 557.2886 |
| P25398 | 40S ribosomal protein S12            |                                            | TALIHDLGLAR                    | 23  | 10 | 54.57  | 2 | 533.808  |
|        |                                      | Carbamidomethyl+C(8)                       | LGEWVGLCK                      | 84  | 9  | 32.48  | 2 | 531.2807 |
|        |                                      |                                            | DVIEEYFK                       | 121 | 8  | 42.93  | 2 | 521.7644 |
|        |                                      | Carbamidomethyl+C(5);Carbamidomethyl+C(11) | QAHLCVLAASNCDEPMYVK            | 45  | 18 | 31.33  | 3 | 712.3372 |
| P46781 | 40S ribosomal protein S9             |                                            | LFEGNALLR                      | 70  | 9  | 57.24  | 2 | 516.7982 |
|        |                                      |                                            | QVVNIPSFIVR                    | 139 | 11 | 53.15  | 2 | 636.384  |
|        |                                      |                                            | LDYILGLK                       | 93  | 8  | 70.87  | 2 | 467.7846 |
|        |                                      |                                            | HIDFSLR                        | 155 | 7  | 42.59  | 1 | 887.4672 |
| P62269 | 40S ribosomal protein S18            |                                            | IPDWFLNR                       | 78  | 8  | 84.84  | 2 | 530.7861 |
|        |                                      |                                            | VITIMQNPR                      | 66  | 9  | 40.26  | 2 | 536.3046 |
|        |                                      |                                            | IAFAITAIK                      | 25  | 9  | 32.48  | 2 | 474.3023 |
|        |                                      |                                            | YSQVLANGLDNK                   | 94  | 12 | 34.75  | 2 | 661.3432 |
|        |                                      |                                            | HFWGLR                         | 124 | 6  | 28.28  | 2 | 408.22   |
|        |                                      |                                            | FQHILR                         | 8   | 6  | 28.28  | 2 | 407.2405 |
|        |                                      |                                            | DGKYSQVLANGLDNK                | 91  | 15 | 19.76  | 3 | 541.2811 |
| P09923 | Intestinal-type alkaline phosphatase |                                            | NLVQEWLAK                      | 250 | 9  | 47.7   | 2 | 550.8133 |
|        |                                      |                                            | FPYLALSK                       | 92  | 8  | 70.87  | 2 | 469.7728 |
|        |                                      |                                            | ANFQTIGLSAAAR                  | 123 | 13 | 76.5   | 2 | 660.3641 |
|        |                                      |                                            | SVGVVTTTR                      | 160 | 9  | 48.21  | 2 | 460.2645 |
|        |                                      |                                            | AGQLTSEEDTLTLVTADHSHVFSFGGYTLR | 359 | 30 | 17.95  | 4 | 813.903  |
|        |                                      |                                            | YEIHRDPTLDPSLMEMTEAALR         | 294 | 22 | 14.62  | 4 | 647.8173 |
|        |                                      |                                            | GFYLFVEGGR                     | 323 | 10 | 55.99  | 2 | 572.7972 |
|        |                                      |                                            | GNEVISVMNR                     | 144 | 10 | 113.46 | 2 | 559.7924 |
|        |                                      |                                            | VQHASPAGTYAHTVNR               | 169 | 16 | 18.72  | 3 | 570.2931 |
|        |                                      |                                            | NLILFLGDGLGVPTVTATR            | 53  | 19 | 78     | 2 | 979.0754 |
|        |                                      | Carbamidomethyl+C(14)                      | QVPDSAATATAYLCGVK              | 106 | 17 | 24.8   | 2 | 876.4474 |
|        |                                      |                                            | GSSIFGLAPSK                    | 389 | 11 | 37.94  | 2 | 532.2839 |
|        |                                      |                                            | LLSRNPR                        | 316 | 7  | 42.59  | 2 | 428.2584 |
|        |                                      |                                            | NGKLGPEPLAMDR                  | 78  | 14 | 20.97  | 3 | 500.2566 |
|        |                                      | Carbamidomethyl+C(14)                      | QVPDSAATATAYLCGVKANFQTIGLSAAAR | 106 | 30 | 23.39  | 4 | 763.8879 |
|        |                                      |                                            | GSSIFGLAPSKAQDSK               | 389 | 16 | 18.72  | 2 | 796.9121 |
|        |                                      |                                            | FPYLALSKTYNVDR                 | 92  | 14 | 28.75  | 2 | 843.9476 |

|        |                                     |                                   |                 |                    |        |    |           |   |          |
|--------|-------------------------------------|-----------------------------------|-----------------|--------------------|--------|----|-----------|---|----------|
| Q14240 | Eukaryotic initiation factor 4A-II  | AGQLTSEEDTLTLVTADHSHVFSFGGYTLR    | 359             | 30                 | 8.54   | 4  | 809.642   |   |          |
|        |                                     | VLITDLLAR                         | 325             | 10                 | 78.53  | 2  | 557.847   |   |          |
|        |                                     | GIYAYGFEEKPSAIQQR                 | 46              | 16                 | 106.47 | 3  | 609.9872  |   |          |
|        |                                     | VFDMLNR                           | 162             | 7                  | 67.52  | 2  | 447.7308  |   |          |
|        |                                     | GFKDQIYEIFQK                      | 191             | 12                 | 24.09  | 2  | 758.3975  |   |          |
|        |                                     | GYDVIAQAQSGTGK                    | 69              | 14                 | 20.97  | 2  | 697.857   |   |          |
|        |                                     | GIDVQQVSLVINIDLPTNR               | 335             | 19                 | 16.31  | 2  | 1072.5755 |   |          |
|        |                                     | ESLLR                             | 41              | 5                  | 27.94  | 1  | 617.3619  |   |          |
|        |                                     | LQAEAPHIVVGTGPR                   | 147             | 15                 | 19.76  | 3  | 515.6244  |   |          |
|        |                                     | DFTVVSALHGDMQK                    | 296             | 14                 | 20.97  | 3  | 521.9138  |   |          |
|        |                                     | GFKDQIYEIFQK                      | 191             | 12                 | 31.29  | 2  | 758.3889  |   |          |
|        |                                     | GIYAYGFEEKPSAIQQR                 | 46              | 16                 | 18.72  | 2  | 954.4623  |   |          |
|        |                                     | YAYGFEEKPSAIQQR                   | 48              | 14                 | 3.76   | 2  | 829.4199  |   |          |
|        |                                     | GFKDQIYEIFQK                      | 191             | 12                 | 13.43  | 3  | 499.9224  |   |          |
| P19338 | Nucleolin                           | LELQGPR                           | 554             | 7                  | 56.56  | 2  | 406.736   |   |          |
|        |                                     | ALELTGLK                          | 362             | 8                  | 42.93  | 2  | 422.7616  |   |          |
|        |                                     | VEGTEPTTAFNLFVGNLNFNK             | 297             | 21                 | 26.7   | 3  | 771.3947  |   |          |
|        |                                     | TLVLSNLSYSATEETLQEVFEK            | 486             | 22                 | 22.8   | 3  | 834.4353  |   |          |
|        |                                     | VTQDELKEVFEDAAEIR                 | 403             | 17                 | 17.81  | 3  | 664.6649  |   |          |
|        |                                     | SISLYYTGEK                        | 457             | 10                 | 43.62  | 2  | 580.8043  |   |          |
|        |                                     | SAPELK                            | 318             | 6                  | 28.28  | 1  | 644.3658  |   |          |
|        |                                     | MAPPPK                            | 16              | 6                  | 14.31  | 1  | 640.3512  |   |          |
|        |                                     | TFEEKQGTEIDGR                     | 444             | 13                 | 22.39  | 2  | 755.3561  |   |          |
|        |                                     | KFGYVDFESAEDLEK                   | 347             | 15                 | 19.76  | 3  | 592.9552  |   |          |
|        |                                     | GGGRGGFGGR                        | 656             | 10                 | 28.84  | 2  | 439.2276  |   |          |
|        |                                     | GGRGGGDHKKPQK                     | 691             | 14                 | 26.41  | 3  | 436.5547  |   |          |
|        |                                     | P32119                            | Peroxiredoxin-2 | QITVNDLPVGR        | 139    | 11 | 95.06     | 2 | 606.3453 |
|        |                                     |                                   |                 | KEGGLGPLNIPLLADVTR | 91     | 18 | 17.01     | 3 | 621.697  |
| GVLR   | 135                                 |                                   |                 | 4                  | 27.6   | 1  | 444.2924  |   |          |
| POCG39 | POTE ankyrin domain family member J | MASGNARIGKPAPDFK                  | 0               | 16                 | 30.65  | 2  | 830.4259  |   |          |
|        |                                     | AGFAGDDAPR                        | 681             | 10                 | 121.41 | 2  | 488.7305  |   |          |
|        |                                     | QEYDESGPSIVHR                     | 1022            | 13                 | 128.46 | 3  | 506.2368  |   |          |
|        |                                     | FTTMAEREIVR                       | 862             | 11                 | 37.93  | 2  | 676.8518  |   |          |
| A5A3E0 | POTE ankyrin domain family member F | EIAALAPSMKK                       | 978             | 11                 | 37.94  | 2  | 581.302   |   |          |
|        |                                     | Oxidation+M()<br>MVAEVD SMPAASSVK | 0               | 15                 | 19.76  | 3  | 513.2503  |   |          |
|        |                                     | AGFAGDDAPR                        | 718             | 10                 | 121.41 | 2  | 488.7305  |   |          |
|        |                                     | QEYDESGPSIVHR                     | 1059            | 13                 | 128.46 | 3  | 506.2368  |   |          |

|        |                                  |                      |                                |      |    |        |   |           |
|--------|----------------------------------|----------------------|--------------------------------|------|----|--------|---|-----------|
|        |                                  |                      | SYELPDGQVITIGNER               | 938  | 16 | 164.73 | 2 | 895.9534  |
|        |                                  |                      | DILHENSTLR                     | 642  | 10 | 50.59  | 2 | 599.3106  |
|        |                                  |                      | FTTMAEREIVR                    | 899  | 11 | 37.93  | 2 | 676.8518  |
|        |                                  |                      | EIAALAPSMMK                    | 1015 | 11 | 37.94  | 2 | 581.302   |
|        |                                  |                      | STHVGFPENLTNGATAGNGDDGLIPPR    | 546  | 27 | 28.34  | 4 | 677.5797  |
|        |                                  |                      | TTGIVMDSGDGVTHTVPIYEGNALPHATLR | 847  | 30 | 17.96  | 3 | 1041.508  |
|        |                                  |                      | AVFPSIVGRPRQQGMMGGMHQK         | 728  | 22 | 14.62  | 4 | 603.8055  |
|        |                                  | Carbamidomethyl+C(2) | ICELLSDYKEK                    | 470  | 11 | 26.18  | 3 | 466.5742  |
|        |                                  | Oxidation+M()        | LDLAGRELPDYLMK                 | 877  | 14 | 20.97  | 3 | 550.6233  |
| Q05639 | Elongation factor 1-alpha 2      |                      | IGGIGTVPVGR                    | 255  | 11 | 147.93 | 2 | 513.308   |
|        |                                  |                      | STTTGHLIYK                     | 20   | 10 | 93.47  | 2 | 560.8052  |
|        |                                  |                      | QTVAVGVK                       | 430  | 9  | 65.19  | 2 | 457.7852  |
|        |                                  |                      | QLIVGVNK                       | 146  | 8  | 84.84  | 2 | 435.7706  |
|        |                                  |                      | EHALLAYTLGVK                   | 134  | 12 | 225.9  | 2 | 657.8805  |
|        |                                  |                      | THINIVVIGHVDSGK                | 5    | 15 | 31.81  | 2 | 794.9384  |
|        |                                  |                      | VETGILRPGMVVTFAPVNITTEVK       | 266  | 24 | 59.2   | 3 | 857.8182  |
|        |                                  |                      | FETTK                          | 79   | 5  | 13.97  | 1 | 625.3257  |
|        |                                  |                      | QTVAVGVK                       | 430  | 9  | 1.37   | 2 | 448.7827  |
|        |                                  |                      | EHALLAYTLGVK                   | 134  | 12 | 2.39   | 3 | 432.9131  |
|        |                                  |                      | IGGIGTVPVGR                    | 255  | 11 | 2.05   | 2 | 504.2969  |
| P04075 | Fructose-bisphosphate aldolase A |                      | IGEHTPSALAIMENANVLAR           | 153  | 20 | 82.24  | 3 | 703.0402  |
|        |                                  | Carbamidomethyl+C(8) | ALANSLACQ GK                   | 331  | 11 | 103.01 | 2 | 566.7953  |
|        |                                  |                      | QLLLTADDR                      | 60   | 9  | 32.48  | 2 | 522.7914  |
|        |                                  |                      | ADDGRFPQVIK                    | 87   | 12 | 99.37  | 3 | 448.2404  |
|        |                                  |                      | GILAADESTGSIK                  | 28   | 14 | 91.61  | 2 | 666.8604  |
|        |                                  |                      | ELSDIAHR                       | 14   | 8  | 38.16  | 2 | 470.7418  |
|        |                                  |                      | FSHEEIAMATVTALR                | 243  | 15 | 84.84  | 3 | 559.29    |
|        |                                  | Carbamidomethyl+C(1) | CPLLKPWALTFSYGR                | 289  | 15 | 27.84  | 3 | 603.6526  |
|        |                                  | Carbamidomethyl+C(5) | YASICQQNGIVPIVEPEILPDGDHDLKR   | 173  | 28 | 43.42  | 4 | 794.9099  |
|        |                                  | Carbamidomethyl+C(4) | VNPCIGGVILFHETLYQK             | 69   | 18 | 17.01  | 3 | 696.7081  |
|        |                                  |                      | ALQASALK                       | 304  | 8  | 70.87  | 2 | 401.2446  |
|        |                                  |                      | IVAPGK                         | 22   | 6  | 28.28  | 1 | 584.3818  |
|        |                                  |                      | GVVPLAGTNGETTTQGLDGLSER        | 111  | 23 | 32.09  | 2 | 1136.5924 |
|        |                                  |                      | PYQYPALTPEQK                   | 1    | 12 | 39.82  | 3 | 478.9107  |
|        |                                  |                      | RLQSIGTENTEENR                 | 42   | 14 | 20.97  | 3 | 549.6075  |
|        |                                  |                      | ENLKAAQEEYVK                   | 318  | 12 | 31.29  | 2 | 711.368   |
|        |                                  | Carbamidomethyl+C(1) | CPLLKPWALTFSYGR                | 289  | 15 | 40.22  | 3 | 630.3066  |

|        |                           |                                            |                          |     |    |        |   |          |
|--------|---------------------------|--------------------------------------------|--------------------------|-----|----|--------|---|----------|
| P27348 | 14-3-3 protein theta      |                                            | FSHEEIAMATVTALR          | 243 | 15 | 7.38   | 3 | 553.2859 |
|        |                           |                                            | NLLSVAYK                 | 41  | 8  | 52.13  | 2 | 454.2662 |
|        |                           |                                            | DSTLIMQLLR               | 212 | 10 | 122.66 | 2 | 595.3385 |
|        |                           | Carbamidomethyl+C(3)                       | SICTTVLELLDK             | 91  | 12 | 96.36  | 2 | 696.383  |
|        |                           |                                            | YLIANATNPESK             | 103 | 12 | 50.49  | 3 | 440.8976 |
| P61981 | 14-3-3 protein gamma      |                                            | VFYLK                    | 115 | 5  | 13.97  | 2 | 335.202  |
|        |                           | Carbamidomethyl+C(3)                       | SICTTVLELLDKYLIANATNPESK | 91  | 24 | 23.06  | 3 | 898.4798 |
|        |                           |                                            | NLLSVAYK                 | 42  | 8  | 52.13  | 2 | 454.2662 |
|        |                           |                                            | DSTLIMQLLR               | 217 | 10 | 122.66 | 2 | 595.3385 |
|        |                           | Carbamidomethyl+C(6)                       | ELEAVCQDVLSLLDNYLIK      | 91  | 19 | 27.99  | 3 | 745.7288 |
| Q06830 | Peroxiredoxin-1           |                                            | ATVVESSEKAYSEAHEISK      | 143 | 19 | 27.99  | 3 | 689.0069 |
|        |                           |                                            | QITVNDLPVGR              | 140 | 11 | 95.06  | 2 | 606.3453 |
|        |                           |                                            | ATAVMPDGQFK              | 16  | 11 | 104.77 | 2 | 582.7941 |
|        |                           |                                            | TIAQDYGVK                | 110 | 10 | 91.71  | 2 | 554.3083 |
|        |                           |                                            | LVQAFQFTDK               | 158 | 10 | 106.47 | 2 | 598.8203 |
|        |                           |                                            | GLFIIDDK                 | 128 | 8  | 66.1   | 2 | 460.7586 |
|        |                           |                                            | ADEGISFR                 | 120 | 8  | 56.9   | 2 | 447.7237 |
|        |                           |                                            | SVDETLR                  | 151 | 7  | 42.59  | 2 | 410.2123 |
|        |                           |                                            | QGGLGPMNIPLVSDPKR        | 93  | 17 | 28.39  | 3 | 593.6508 |
|        |                           | Carbamidomethyl+C(3);Carbamidomethyl+C(15) | LNCQVIGASVDSHFCHLAWVNTPK | 68  | 24 | 13.76  | 4 | 689.0877 |
|        |                           | Carbamidomethyl+C(5)                       | HGEVCPAGWKPGSDTIKPDVQK   | 168 | 22 | 33.34  | 4 | 602.2994 |
|        |                           |                                            | DISLSDYK                 | 27  | 8  | 42.93  | 2 | 470.7371 |
|        |                           |                                            | QGGLGPMNIPLVSDPK         | 93  | 16 | 25.25  | 2 | 811.9198 |
|        |                           |                                            | KQGGLGPMNIPLVSDPK        | 92  | 17 | 72.8   | 3 | 584.3224 |
|        |                           |                                            | MSSGNAKIGHAPNFK          | 0   | 16 | 18.72  | 3 | 552.6179 |
| P26641 | Elongation factor 1-gamma |                                            | DEGISFR                  | 121 | 7  | 1.02   | 1 | 823.4024 |
|        |                           |                                            | AQDYGVK                  | 112 | 8  | 8.69   | 1 | 893.4788 |
|        |                           |                                            | ILGLLDAYLK               | 137 | 10 | 107.44 | 2 | 559.8476 |
|        |                           |                                            | EYFSWEGAFQHVGK           | 414 | 14 | 79.11  | 3 | 562.2658 |
|        |                           |                                            | TFLVGER                  | 149 | 7  | 39.58  | 2 | 411.2254 |
|        |                           |                                            | ALIAAQYSGAQVR            | 17  | 13 | 120.84 | 2 | 674.3793 |
|        |                           | Carbamidomethyl+C(5)                       | WFLTCINQPQFR             | 189 | 12 | 64.46  | 2 | 805.4101 |
|        |                           |                                            | TPEFLR                   | 45  | 6  | 42.25  | 2 | 381.71   |
|        |                           |                                            | DPFAHLPK                 | 277 | 8  | 38.16  | 2 | 462.7534 |
|        |                           |                                            | STFVLDEFK                | 285 | 9  | 48.21  | 2 | 543.2878 |
|        |                           |                                            | AAGTLYTYPENWR            | 1   | 13 | 57.01  | 2 | 771.3853 |
|        |                           |                                            | VLSAPPHFHFGQTNR          | 30  | 15 | 27.84  | 2 | 854.4402 |

|                       |                                           |                       |                                  |        |    |         |   |           |
|-----------------------|-------------------------------------------|-----------------------|----------------------------------|--------|----|---------|---|-----------|
| Q04917                | 14-3-3 protein eta                        |                       | VLSAPPHFHFGQTNRTPEFLR            | 30     | 21 | 23.57   | 3 | 817.759   |
|                       |                                           |                       | NLLSVAYK                         | 42     | 8  | 52.13   | 2 | 454.2662  |
|                       |                                           |                       | DSTLIMQLLR                       | 217    | 10 | 122.66  | 2 | 595.3385  |
|                       |                                           |                       | YLAEVASGEK                       | 132    | 10 | 28.84   | 2 | 533.7752  |
|                       |                                           |                       | EQMQPTHPIR                       | 162    | 10 | 35.83   | 3 | 412.8709  |
|                       |                                           |                       | AVTELNEPLSNEDR                   | 28     | 14 | 20.97   | 3 | 529.5958  |
| P68104                | Elongation factor 1-alpha 1               | Carbamidomethyl+C(22) | LGLALNFSVFYYEIQNAPEQACLLAK       | 172    | 26 | 22.85   | 3 | 991.5005  |
|                       |                                           |                       | GDYYRYLAEVASGEK                  | 127    | 15 | 19.76   | 3 | 574.283   |
|                       |                                           | Oxidation+M(22)       | NSVVEASEAAAYKEAFEISKEQMQPTHPIR   | 143    | 29 | 36.85   | 4 | 827.1534  |
|                       |                                           |                       | IGGIGTVPVGR                      | 255    | 11 | 147.93  | 2 | 513.308   |
|                       |                                           |                       | YYVTIIDAPGHR                     | 84     | 12 | 179.22  | 3 | 468.9101  |
|                       |                                           |                       | STTTGHLIYK                       | 20     | 10 | 93.47   | 2 | 560.8052  |
|                       |                                           |                       | QTVAVGVK                         | 430    | 9  | 65.19   | 2 | 457.7852  |
|                       |                                           |                       | VETGVLKPGMVVTFAPVNVTEVK          | 266    | 24 | 149.24  | 3 | 839.1325  |
|                       |                                           |                       | QLIVGVNK                         | 146    | 8  | 84.84   | 2 | 435.7706  |
|                       |                                           | Carbamidomethyl+C(15) | DGNASGTTLEALDCILPPTTRPTDKPLR     | 219    | 28 | 154.97  | 4 | 756.145   |
|                       |                                           | Carbamidomethyl+C(16) | KDGNASGTTLEALDCILPPTTRPTDKPLR    | 218    | 29 | 105.79  | 4 | 788.1703  |
|                       |                                           | Carbamidomethyl+C(16) | SGDAAIIVDMVPGKPMCVESFSDYPPPLGR   | 395    | 28 | 99.28   | 3 | 999.1456  |
| Q5VTE0                | Putative elongation factor 1-alpha-like 3 |                       | EHALLAYTLGVK                     | 134    | 12 | 225.9   | 2 | 657.8805  |
|                       |                                           |                       | EVSTYIK                          | 172    | 7  | 42.59   | 2 | 420.2273  |
|                       |                                           |                       | THINIVVIGHVDSGK                  | 5      | 15 | 31.81   | 2 | 794.9384  |
|                       |                                           |                       | YYVTIIDAPGHRDFIK                 | 84     | 16 | 26.42   | 3 | 636.6658  |
|                       |                                           |                       | YEEIVK                           | 166    | 6  | 28.28   | 1 | 780.4167  |
|                       |                                           |                       | IGYNPDTVAFVPISGWNGDNMLEPSANMPWFK | 180    | 32 | 106.98  | 3 | 1189.9106 |
|                       |                                           | Carbamidomethyl+C(11) | STTTGHLIYKCGGIDK                 | 20     | 16 | 18.72   | 3 | 584.301   |
|                       |                                           |                       | GSFKYAWVLDK                      | 51     | 11 | 44.12   | 2 | 657.3483  |
|                       |                                           |                       | TIIDAPGHR                        | 87     | 9  | 2.39    | 2 | 490.2744  |
|                       |                                           |                       | GTVPVGR                          | 259    | 7  | 2.05    | 1 | 685.4028  |
|                       |                                           |                       | IIDAPGHR                         | 88     | 8  | 2.39    | 2 | 439.7471  |
|                       |                                           | Carbamidomethyl+C(6)  | LEALDCILPPTTRPTDKPLR             | 228    | 19 | 8.36    | 3 | 735.74    |
| Q5VTE0                | Putative elongation factor 1-alpha-like 3 |                       | IGGIGTVPVGR                      | 255    | 11 | 147.93  | 2 | 513.308   |
|                       |                                           |                       | YYVTIIDAPGHR                     | 84     | 12 | 179.22  | 3 | 468.9101  |
|                       |                                           |                       | STTTGHLIYK                       | 20     | 10 | 93.47   | 2 | 560.8052  |
|                       |                                           |                       | QTVAVGVK                         | 430    | 9  | 65.19   | 2 | 457.7852  |
|                       |                                           |                       | VETGVLKPGMVVTFAPVNVTEVK          | 266    | 24 | 149.24  | 3 | 839.1325  |
|                       |                                           |                       | QLIVGVNK                         | 146    | 8  | 84.84   | 2 | 435.7706  |
| Carbamidomethyl+C(15) | DGNASGTTLEALDCILPPTTRPTDKPLR              | 219                   | 28                               | 154.97 | 4  | 756.145 |   |           |

|        |                                |                                           |                              |     |    |        |   |          |
|--------|--------------------------------|-------------------------------------------|------------------------------|-----|----|--------|---|----------|
|        |                                | Carbamidomethyl+C(16)                     | KDGNASGTTLLEALDCILPPTRPDKPLR | 218 | 29 | 105.79 | 4 | 788.1703 |
|        |                                | Carbamidomethyl+C(16)                     | SGDAAIIVDMVPGKPMCVESFSDYPLGR | 395 | 28 | 99.28  | 3 | 999.1456 |
|        |                                |                                           | EHALLAYTLGVK                 | 134 | 12 | 225.9  | 2 | 657.8805 |
|        |                                |                                           | EVSTYIK                      | 172 | 7  | 42.59  | 2 | 420.2273 |
|        |                                |                                           | THINIVVIGHVDSGK              | 5   | 15 | 31.81  | 2 | 794.9384 |
|        |                                |                                           | YYVTIIDAPGHRDFIK             | 84  | 16 | 26.42  | 3 | 636.6658 |
|        |                                |                                           | AAGAGK                       | 444 | 6  | 14.31  | 1 | 474.2671 |
|        |                                |                                           | GITIDISLWK                   | 69  | 10 | 28.84  | 2 | 573.3262 |
|        |                                |                                           | EVSTYIKK                     | 172 | 8  | 35.15  | 2 | 484.2722 |
|        |                                | Carbamidomethyl+C(16)                     | KDGNASGTTLLEALDCILPPTRPDKPLR | 218 | 29 | 12.27  | 4 | 788.1747 |
|        |                                |                                           | DMRQTVAVGVK                  | 427 | 12 | 24.09  | 3 | 439.5856 |
|        |                                |                                           | VTIIDAPGHR                   | 86  | 10 | 7.91   | 2 | 539.8063 |
|        |                                |                                           | TGHLIYK                      | 23  | 7  | 23.63  | 2 | 416.2419 |
|        |                                |                                           | AYTLGVK                      | 139 | 7  | 22.55  | 2 | 376.2228 |
|        |                                |                                           | PPTRPDKPLR                   | 236 | 11 | 8.21   | 2 | 639.3673 |
|        |                                |                                           | EVSTYIK                      | 172 | 7  | 0.68   | 2 | 411.2241 |
|        |                                |                                           | STTTGHLIYK                   | 20  | 10 | 1.71   | 3 | 368.1982 |
| P61247 | 40S ribosomal protein S3a      | Carbamidomethyl+C(2)                      | ACQSIYPLHDVFVR               | 199 | 14 | 86.39  | 3 | 568.9569 |
|        |                                | Carbamidomethyl+C(2)                      | NCLTNFHGMDLTR                | 94  | 13 | 48.78  | 3 | 526.9121 |
|        |                                |                                           | MMEIMTR                      | 167 | 7  | 42.59  | 2 | 456.2143 |
|        |                                |                                           | TSYAQHQQVR                   | 152 | 10 | 76.49  | 3 | 406.5422 |
|        |                                |                                           | VVDPFSK                      | 20  | 7  | 42.59  | 2 | 396.2157 |
|        |                                |                                           | DWYDVK                       | 28  | 6  | 28.28  | 2 | 413.1919 |
|        |                                |                                           | KTSYAQHQQVR                  | 151 | 11 | 26.18  | 2 | 673.3491 |
| P31947 | 14-3-3 protein sigma           |                                           | NLLSVAYK                     | 41  | 8  | 52.13  | 2 | 454.2662 |
|        |                                |                                           | DSTLIMQLLR                   | 214 | 10 | 122.66 | 2 | 595.3385 |
|        |                                |                                           | YLAEVATGDDK                  | 129 | 11 | 37.94  | 3 | 394.5304 |
| P14618 | Pyruvate kinase isozymes M1/M2 |                                           | ITLDNAYMEK                   | 141 | 10 | 74.73  | 2 | 599.2969 |
|        |                                |                                           | TATESFASDPILYRPVAVALDTK      | 92  | 23 | 90.49  | 3 | 822.4397 |
|        |                                |                                           | VNFAMNVGK                    | 489 | 9  | 94.38  | 2 | 490.2572 |
|        |                                |                                           | APIIAVTR                     | 447 | 8  | 67.86  | 2 | 420.7646 |
|        |                                | Carbamidomethyl+C(6)                      | NTGICTIGPASR                 | 43  | 13 | 105.9  | 2 | 680.3613 |
|        |                                |                                           | GDLGIEIPAEK                  | 294 | 11 | 133.96 | 2 | 571.3128 |
|        |                                |                                           | IYVDDGLISLQVK                | 173 | 13 | 141.62 | 2 | 731.9194 |
|        |                                | Carbamidomethyl+C(1);Carbamidomethyl+C(2) | CCSGAIVLTK                   | 422 | 11 | 29.19  | 2 | 611.326  |
|        |                                |                                           | MQHLIAR                      | 376 | 7  | 84.5   | 2 | 434.7413 |
|        |                                | Carbamidomethyl+C(16)                     | AEGSDVANAVLDGADCIMLSGETAK    | 342 | 25 | 28.94  | 3 | 832.0605 |

|                                           |                          |                                            |                         |        |       |          |          |           |
|-------------------------------------------|--------------------------|--------------------------------------------|-------------------------|--------|-------|----------|----------|-----------|
| P23396                                    | 40S ribosomal protein S3 | Carbamidomethyl+C(7)                       | GIFPVLCKDPVQEAWAEDVDLR  | 467    | 22    | 42.75    | 3        | 853.1032  |
|                                           |                          |                                            | GVNLPGAAVDLPAVSEKDIQDLK | 207    | 23    | 14.17    | 3        | 783.7617  |
|                                           |                          |                                            | VVPVP                   | 526    | 5     | 41.91    | 1        | 510.3291  |
|                                           |                          | Carbamidomethyl+C(1)                       | CDENILWLDYK             | 151    | 11    | 26.18    | 2        | 734.8534  |
|                                           |                          |                                            | GADFLVTEVENGGSLGSK      | 188    | 18    | 56.25    | 2        | 890.4522  |
|                                           |                          |                                            | LAPITSDPTEATAVGAVEASFK  | 400    | 22    | 23.37    | 2        | 1088.0775 |
|                                           |                          |                                            | VFLAQK                  | 305    | 6     | 28.28    | 2        | 353.2186  |
|                                           |                          |                                            | GVNLPGAAVDLPAVSEK       | 207    | 17    | 29.64    | 2        | 818.9591  |
|                                           |                          |                                            | MMIGR                   | 311    | 5     | 27.94    | 1        | 607.309   |
|                                           |                          | Carbamidomethyl+C(7)                       | AGKPVICATQMLESNIK       | 319    | 17    | 24.8     | 3        | 626.3209  |
|                                           |                          |                                            | NPQTAR                  | 455    | 6     | 14.31    | 1        | 686.3655  |
|                                           |                          |                                            | KGVNLPGAAVDLPAVSEK      | 206    | 18    | 44.5     | 3        | 589.0021  |
|                                           |                          |                                            | RFDEILEASDGIMVAR        | 278    | 16    | 95.77    | 3        | 607.9789  |
|                                           |                          |                                            | GATLKITLDNAYMEK         | 136    | 15    | 31.81    | 3        | 556.625   |
|                                           |                          |                                            | IENHEGVRR               | 270    | 9     | 40.26    | 2        | 555.2879  |
|                                           |                          |                                            | NPQTARQAHLR             | 455    | 12    | 31.29    | 3        | 485.5905  |
|                                           |                          |                                            | EMIKSGMVAR              | 62     | 11    | 26.18    | 3        | 412.5505  |
|                                           |                          | Carbamidomethyl+C(1);Carbamidomethyl+C(10) | CNRAGKPVICATQMLESNIK    | 316    | 20    | 23.81    | 3        | 769.7189  |
|                                           |                          | Carbamidomethyl+C(7);Oxidation+M()         | AGKPVICATQMLESNIK       | 319    | 17    | 17.81    | 3        | 631.6644  |
|                                           |                          |                                            | ILYRPVAVALDTK           | 102    | 13    | 6.15     | 3        | 486.9659  |
|                                           |                          |                                            | IMLPWDPTGK              | 187    | 10    | 42.81    | 2        | 579.3092  |
|                                           |                          |                                            | TEIILATR                | 45     | 9     | 65.19    | 2        | 515.3213  |
|                                           |                          |                                            | FIMESGAK                | 124    | 8     | 42.93    | 2        | 441.7268  |
|                                           | FVDGLMIHSGDPVNYVDTAVR    | 151                                        | 22                      | 33.34  | 3     | 823.411  |          |           |
|                                           | DEILPTTPISEK             | 214                                        | 13                      | 27.16  | 3     | 490.9321 |          |           |
| Carbamidomethyl+C(3)                      | GLCAIAQAESLR             | 94                                         | 12                      | 70.64  | 2     | 644.8452 |          |           |
|                                           | FVADGIFK                 | 10                                         | 8                       | 50.88  | 2     | 448.7513 |          |           |
|                                           | HVLLR                    | 173                                        | 5                       | 41.91  | 2     | 319.2093 |          |           |
|                                           | GGKPEPPAMPQPVPTA         | 227                                        | 16                      | 37.83  | 2     | 787.4175 |          |           |
|                                           | FGFPEGSVELYAEK           | 76                                         | 14                      | 20.97  | 3     | 524.9208 |          |           |
|                                           | ELAEDGYSGVEVR            | 27                                         | 13                      | 29.87  | 2     | 712.3472 |          |           |
| P62258                                    | 14-3-3 protein epsilon   | NLLSVAYK                                   | 42                      | 8      | 52.13 | 2        | 454.2662 |           |
|                                           | DSTLIMQLLR               | 215                                        | 10                      | 122.66 | 2     | 595.3385 |          |           |
| Carbamidomethyl+C(3);Carbamidomethyl+C(4) | LICCDILDVLDK             | 94                                         | 12                      | 47.47  | 2     | 738.884  |          |           |
|                                           | NVIGAR                   | 50                                         | 6                       | 28.28  | 1     | 629.3769 |          |           |
|                                           | VFYYK                    | 118                                        | 5                       | 27.94  | 2     | 360.1955 |          |           |
|                                           | HLIPAANTGESK             | 106                                        | 12                      | 24.09  | 3     | 413.2246 |          |           |

|                      |                                 |                                                             |                          |                |          |          |        |          |          |
|----------------------|---------------------------------|-------------------------------------------------------------|--------------------------|----------------|----------|----------|--------|----------|----------|
| P07195               | L-lactate dehydrogenase B chain | Carbamidomethyl+C(3);Carbamidomethyl+C(4)<br>Oxidation+M(7) | VAGMDVELTVEER            | 29             | 13       | 34.81    | 2      | 724.3595 |          |
|                      |                                 |                                                             | IISSEQKEENK              | 61             | 12       | 24.09    | 3      | 473.2517 |          |
|                      |                                 |                                                             | HLIPAANTGESKVFYK         | 106            | 17       | 24.8     | 2      | 969.5027 |          |
|                      |                                 |                                                             | LICCDILDVLDKHLIPAANTGESK | 94             | 24       | 21.25    | 3      | 899.1401 |          |
|                      |                                 |                                                             | AASDIAMTELPPTHPIR        | 153            | 17       | 24.8     | 2      | 918.4677 |          |
|                      |                                 |                                                             | Carbamidomethyl+C(6)     | VIGSGCNLDSAR   | 158      | 12       | 83.2   | 2        | 624.8069 |
|                      |                                 |                                                             |                          | FIIPQIVK       | 119      | 8        | 66.1   | 2        | 479.3089 |
|                      |                                 |                                                             |                          | MVVESAYEVIK    | 233      | 11       | 119.99 | 2        | 634.3387 |
|                      |                                 |                                                             |                          | IHPVSTMVK      | 270      | 9        | 48.05  | 2        | 506.2871 |
|                      |                                 |                                                             |                          | IVADKDYSVTANSK | 77       | 14       | 45.6   | 3        | 504.2638 |
|                      |                                 | LIAPVAEEEEATVPNNK                                           |                          | 7              | 16       | 122.16   | 2      | 847.9609 |          |
|                      |                                 | IVVVTAGVR                                                   |                          | 91             | 9        | 57.24    | 2      | 457.2984 |          |
|                      |                                 | GLTSVINQK                                                   |                          | 299            | 9        | 40.26    | 2      | 480.2821 |          |
|                      |                                 | GEMMDLQHGSFLQTPK                                            |                          | 60             | 17       | 29.64    | 3      | 644.6518 |          |
|                      |                                 | SADTLWDIQQ                                                  |                          | 319            | 10       | 42.81    | 2      | 588.8059 |          |
|                      |                                 | Carbamidomethyl+C(8)<br>Oxidation+M(18)                     | YLMAEK                   | 172            | 6        | 42.25    | 2      | 377.6941 |          |
|                      |                                 |                                                             | SLADELALVDVLEDK          | 43             | 15       | 162.46   | 2      | 815.4439 |          |
|                      |                                 |                                                             | IVADK                    | 77             | 5        | 13.97    | 1      | 545.3271 |          |
|                      |                                 |                                                             | NVNVFK                   | 113            | 6        | 14.31    | 2      | 360.707  |          |
|                      |                                 |                                                             | LSGLPK                   | 150            | 6        | 14.31    | 1      | 614.3931 |          |
| SLADELALVDVLEDKLK    | 43                              |                                                             | 17                       | 46.5           | 3        | 624.3527 |        |          |          |
| HRVIGSGCNLDSAR       | 156                             |                                                             | 14                       | 20.97          | 3        | 514.5973 |        |          |          |
| GYTNWAIGLSVADLIESMLK | 246                             |                                                             | 20                       | 23.81          | 3        | 733.0376 |        |          |          |
| VVTAGVR              | 93                              |                                                             | 7                        | 1.37           | 1        | 701.4365 |        |          |          |
| TSVINQK              | 301                             |                                                             | 7                        | 1.37           | 1        | 789.4507 |        |          |          |
| P30041               | Peroxiredoxin-6                 |                                                             | LPFPIIDDR                | 97             | 9        | 57.24    | 2      | 543.3079 |          |
|                      |                                 |                                                             | LIALSIDSVEDHLAWSK        | 67             | 17       | 82.22    | 3      | 633.0087 |          |
|                      |                                 |                                                             | LSILYPATTGR              | 144            | 11       | 29.19    | 2      | 596.3462 |          |
|                      |                                 |                                                             | ELAILLGMLDPAEKDEK        | 108            | 17       | 74.69    | 3      | 629.0055 |          |
|                      |                                 |                                                             | VVFVFGPDKK               | 132            | 10       | 55.99    | 2      | 568.3324 |          |
|                      |                                 |                                                             | VATPVDWK                 | 174            | 8        | 42.93    | 2      | 458.2554 |          |
|                      |                                 |                                                             | VVFVFGPDK                | 132            | 9        | 40.26    | 2      | 504.287  |          |
|                      |                                 |                                                             | MPGGLLLGDVAPNFEANTTVGR   | 0              | 22       | 26.16    | 3      | 743.7111 |          |
|                      |                                 |                                                             | IRFHDFLGDSWGILFSHPR      | 22             | 19       | 25.48    | 3      | 767.4031 |          |
|                      |                                 |                                                             | FVFGPDKK                 | 134            | 8        | 1.71     | 2      | 469.2624 |          |
| VATPVDWK             | 174                             | 8                                                           | 1.02                     | 2              | 449.2466 |          |        |          |          |
| ELAILLGMLDPAEKDEK    | 108                             | 17                                                          | 4.1                      | 3              | 623.0004 |          |        |          |          |

|                                            |                                 |                                           |                                 |     |                |        |    |           |   |          |
|--------------------------------------------|---------------------------------|-------------------------------------------|---------------------------------|-----|----------------|--------|----|-----------|---|----------|
| P05388                                     | 60S acidic ribosomal protein P0 |                                           | IIQLDDYPK                       | 16  | 10             | 42.81  | 2  | 609.3451  |   |          |
|                                            |                                 |                                           | TSFFQALGITTK                    | 134 | 12             | 52.99  | 2  | 657.3627  |   |          |
|                                            |                                 |                                           | AFLADPSAFVAAAPVAAATTAAPAAAAAPAK | 266 | 31             | 92.15  | 3  | 918.1679  |   |          |
|                                            |                                 |                                           | GHLENNPALEK                     | 66  | 11             | 44.12  | 2  | 611.321   |   |          |
|                                            |                                 |                                           | GTIEILSDVQLIK                   | 149 | 13             | 88.92  | 2  | 714.9276  |   |          |
|                                            |                                 |                                           | FLEGVR                          | 214 | 6              | 45.26  | 2  | 360.7062  |   |          |
|                                            |                                 | Carbamidomethyl+C(6)                      | NVASVCLQIGYPTVASVPHSIINGYK      | 220 | 26             | 13.07  | 3  | 929.829   |   |          |
|                                            |                                 |                                           | QMQQIR                          | 38  | 6              | 14.31  | 2  | 402.2124  |   |          |
|                                            |                                 | P62826                                    | GTP-binding nuclear protein Ran |     | LVLVGDGGTGK    | 12     | 11 | 56.33     | 2 | 508.2963 |
|                                            |                                 |                                           |                                 |     | SNYNFEKPFLWLAR | 152    | 14 | 51.62     | 3 | 595.6439 |
|                                            | NLQYYDISAK                      |                                           |                                 | 142 | 10             | 92.5   | 2  | 607.8125  |   |          |
|                                            | HLTGEFEK                        |                                           |                                 | 29  | 8              | 70.87  | 2  | 480.7436  |   |          |
|                                            | YVATLGVEVHPLVFHTNR              |                                           |                                 | 38  | 18             | 39.92  | 3  | 684.7107  |   |          |
|                                            | FNVWDTAGQEK                     |                                           |                                 | 60  | 11             | 68.08  | 2  | 647.816   |   |          |
| Carbamidomethyl+C(2);Carbamidomethyl+C(10) | VCENIPIVLCGNK                   |                                           |                                 | 110 | 13             | 43.84  | 3  | 505.9246  |   |          |
|                                            | SIVFHR                          |                                           |                                 | 134 | 6              | 14.31  | 2  | 379.7176  |   |          |
| Carbamidomethyl+C(6);Carbamidomethyl+C(14) | DLVRVCENIPIVLCGNK               |                                           |                                 | 106 | 17             | 17.81  | 2  | 1000.0195 |   |          |
| Carbamidomethyl+C(14);Oxidation+M(18)      | FGGLRDGYYIQAQCAIIMFDVTSR        |                                           |                                 | 71  | 24             | 13.76  | 3  | 933.122   |   |          |
| P68366                                     | Tubulin alpha-4A chain          |                                           | IHFPLATYAPVISA EK               | 264 | 16             | 101.78 | 3  | 586.3254  |   |          |
|                                            |                                 |                                           | NLDIERPTYTNLNR                  | 215 | 14             | 73.38  | 3  | 573.6324  |   |          |
|                                            |                                 |                                           | LISQIVSSITASLR                  | 229 | 14             | 183.87 | 2  | 744.4493  |   |          |
|                                            |                                 |                                           | FDLMYAK                         | 394 | 7              | 67.52  | 2  | 444.2196  |   |          |
|                                            |                                 | Carbamidomethyl+C(4);Carbamidomethyl+C(5) | YMACCLLYR                       | 311 | 9              | 57.24  | 2  | 625.2871  |   |          |
|                                            |                                 |                                           | QLFHPEQLITGK                    | 84  | 12             | 37.31  | 3  | 470.9275  |   |          |
|                                            |                                 |                                           | EDMAALEK                        | 422 | 8              | 42.93  | 2  | 453.719   |   |          |
|                                            |                                 |                                           | LSVDYGK                         | 156 | 7              | 42.59  | 2  | 391.2075  |   |          |
|                                            |                                 |                                           | LSVDYGKK                        | 156 | 8              | 42.93  | 2  | 455.2583  |   |          |
|                                            |                                 |                                           | AFVHWYV GEGMEEGEFSEAR           | 402 | 20             | 15.68  | 3  | 777.3528  |   |          |
|                                            |                                 |                                           | FDGALNVDL TEFQTNLVPYPR          | 243 | 21             | 15.12  | 3  | 803.7496  |   |          |
|                                            |                                 |                                           | AVFVDLEPTVIDEIR                 | 64  | 15             | 61.46  | 2  | 858.4731  |   |          |
|                                            |                                 | Carbamidomethyl+C(8)                      | SIQFVDWCPTGFK                   | 339 | 13             | 157.35 | 2  | 792.8888  |   |          |
|                                            |                                 | Carbamidomethyl+C(3)                      | AVCMLSNTTAIAEAWAR               | 373 | 17             | 39.18  | 2  | 932.9675  |   |          |
|                                            |                                 | Carbamidomethyl+C(15)                     | AYHEQLSVAEITNACFEPANQMVK        | 280 | 24             | 13.76  | 3  | 917.445   |   |          |
| Q9H4B7                                     | Tubulin beta-1 chain            |                                           | PVISA EK                        | 273 | 7              | 3.76   | 2  | 372.2194  |   |          |
|                                            |                                 |                                           | LAVNMVPPFR                      | 252 | 10             | 141.4  | 2  | 572.323   |   |          |
|                                            |                                 |                                           | IREEYPDR                        | 154 | 8              | 78.65  | 2  | 539.2682  |   |          |
|                                            |                                 |                                           | EVDQQLLSVQTR                    | 324 | 12             | 52.99  | 3  | 472.5885  |   |          |

|                |                           |                          |                 |     |          |       |           |          |
|----------------|---------------------------|--------------------------|-----------------|-----|----------|-------|-----------|----------|
| P62277         | 40S ribosomal protein S13 | LHFFMPGFAPLTAQGSQQYR     | 262             | 20  | 15.68    | 3     | 766.0556  |          |
|                |                           | IMNSFSVMPSPK             | 162             | 12  | 28.07    | 2     | 669.3417  |          |
|                |                           | AVLVDLEPGTMD SIR         | 62              | 15  | 27.84    | 2     | 808.4322  |          |
|                |                           | VDQQLLSVQTR              | 325             | 11  | 7.91     | 2     | 643.8509  |          |
|                |                           | GLAPDLPEDLYHLIK          | 78              | 15  | 122.77   | 3     | 565.3089  |          |
|                |                           | LILIESR                  | 114             | 7   | 39.58    | 2     | 422.2687  |          |
|                |                           | GLSQSALPYR               | 9               | 10  | 35.83    | 2     | 546.3009  |          |
|                |                           | GLTPSQIGVILR             | 43              | 12  | 119.66   | 2     | 627.3879  |          |
|                |                           | SVPTWLK                  | 20              | 7   | 39.58    | 2     | 415.7486  |          |
|                |                           | KGLTPSQIGVILR            | 42              | 13  | 34.81    | 3     | 461.2882  |          |
|                |                           | LTSDDVKEQIYK             | 27              | 12  | 24.09    | 2     | 719.876   |          |
|                |                           | GLAPDLPEDLYHLIKK         | 78              | 16  | 18.72    | 3     | 634.6613  |          |
|                |                           | PDLPEDLYHLIK             | 81              | 12  | 7.38     | 2     | 726.8982  |          |
|                |                           | APDLPEDLYHLIK            | 80              | 13  | 27.84    | 2     | 762.4131  |          |
| O43707         | Alpha-actinin-4           | LASDLLEWIR               | 300             | 10  | 107.44   | 2     | 608.3461  |          |
|                |                           | VGWEQLLTTIAR             | 733             | 12  | 34.3     | 2     | 693.8983  |          |
|                |                           | HTNYTMEHIR               | 723             | 10  | 35.83    | 3     | 434.539   |          |
|                |                           | NFITAEELR                | 859             | 9   | 32.48    | 2     | 546.787   |          |
|                |                           | KDDPVTNLNNAFEVAEK        | 216             | 17  | 39.14    | 3     | 635.3226  |          |
|                |                           | DLLLDPAWEK               | 40              | 10  | 28.84    | 2     | 600.3229  |          |
|                |                           | FAIQDISVEETSAK           | 152             | 14  | 26.41    | 3     | 513.2572  |          |
|                |                           | LSNRPAFMPSEGK            | 365             | 13  | 29.87    | 3     | 478.582   |          |
|                |                           | VLAVNQENEHLMEDY EK       | 283             | 17  | 17.81    | 3     | 687.6643  |          |
|                |                           | LSGSNPYTTVTPQIINSK       | 604             | 18  | 17.01    | 2     | 960.5069  |          |
|                |                           | AIMTYVSSFYHAFSGAQK       | 255             | 18  | 53.53    | 2     | 1004.4737 |          |
|                |                           | DGLAFNALIHR              | 193             | 11  | 26.18    | 2     | 613.8427  |          |
|                |                           | IMSLVDPNHSGLVTFQAFIDFMSR | 813             | 24  | 30.95    | 4     | 682.0893  |          |
|                |                           | TIPWLEDR                 | 311             | 8   | 35.15    | 2     | 515.2743  |          |
|                |                           | Carbamidomethyl+C(2)     | AC LISLGYDVENDR | 791 | 14       | 20.97 | 2         | 812.8965 |
|                |                           | DDPVTNLNNAFEVAEK         | 217             | 16  | 39.68    | 3     | 592.626   |          |
|                |                           | Carbamidomethyl+C(10)    | ELPPDQAEYCIAR   | 869 | 13       | 27.16 | 2         | 781.381  |
|                |                           | ISIEMNGTLEDQLSHLK        | 674             | 17  | 17.81    | 3     | 643.3384  |          |
|                |                           | VPQKTIQEMQQK             | 319             | 12  | 36.81    | 2     | 729.3852  |          |
|                |                           | TAPYKNVNVQNFHISWK        | 176             | 17  | 17.81    | 3     | 682.6885  |          |
| TIQEMQQKLEDFR  | 323                       | 13                       | 32.16           | 2   | 833.4143 |       |           |          |
| KAGTQIENIDEDFR | 65                        | 14                       | 26.41           | 3   | 545.9339 |       |           |          |
| P13639         | Elongation factor 2       | VFSGLVSTGLK              | 415             | 11  | 50.14    | 2     | 554.3257  |          |

|                       |                            |     |    |        |   |          |
|-----------------------|----------------------------|-----|----|--------|---|----------|
|                       | VNFTVDQIR                  | 1   | 9  | 32.48  | 2 | 546.2993 |
|                       | GGGQIPTAR                  | 716 | 10 | 91.71  | 2 | 485.2789 |
|                       | GPLMMYISK                  | 391 | 9  | 79.16  | 2 | 520.274  |
|                       | FSVSPVVR                   | 498 | 8  | 81.83  | 2 | 445.7566 |
|                       | NMSVIAHVDHGK               | 20  | 12 | 58.27  | 3 | 436.5546 |
|                       | VFDAIMNFK                  | 299 | 9  | 94.38  | 2 | 542.7809 |
|                       | WLPAGDALLQMITIHLPSVTAQK    | 342 | 24 | 108.32 | 3 | 867.4852 |
| Carbamidomethyl+C(3)  | TFCQLILDPIFK               | 287 | 12 | 145.26 | 2 | 747.9126 |
| Carbamidomethyl+C(1)  | CLYASVLTAQPR               | 727 | 12 | 116.35 | 2 | 689.867  |
| Carbamidomethyl+C(9)  | STLTDSLVCK                 | 32  | 10 | 54.57  | 2 | 562.2892 |
|                       | GHVFEEESQVAGTPMFVVK        | 767 | 18 | 107.11 | 3 | 654.6681 |
|                       | IKPVLMMNK                  | 150 | 9  | 57.24  | 2 | 537.3201 |
|                       | SDPVVSYR                   | 572 | 8  | 56.9   | 2 | 461.7394 |
|                       | KEDLYLKPIQR                | 438 | 11 | 26.18  | 3 | 468.2754 |
|                       | ALLELQLEPEELYQTFQR         | 162 | 18 | 67.41  | 3 | 740.7244 |
|                       | DSVVAGFQWATK               | 676 | 12 | 68.42  | 2 | 654.8351 |
|                       | NPADLPK                    | 512 | 7  | 56.56  | 2 | 377.7071 |
|                       | STAISLFYELSENDLNFIK        | 71  | 19 | 57.59  | 3 | 735.3806 |
| Carbamidomethyl+C(12) | LMEPIYLVEIQCEQVVGGIYGV LNR | 739 | 26 | 130.61 | 3 | 997.1994 |
|                       | YEWVVAEAR                  | 638 | 9  | 60.25  | 2 | 569.7698 |
|                       | QFAEMYVAK                  | 226 | 9  | 57.24  | 2 | 543.7745 |
|                       | EDLYLKPIQR                 | 439 | 10 | 45.82  | 2 | 637.8672 |
| Carbamidomethyl+C(5)  | EGALCEENMR                 | 688 | 10 | 38.84  | 2 | 604.7632 |
|                       | AYLPVNESFGFTADLR           | 785 | 16 | 37.83  | 2 | 900.4648 |
|                       | FYAFGR                     | 409 | 6  | 28.28  | 2 | 380.6929 |
|                       | FDVHDVTLHADAHR             | 701 | 15 | 27.84  | 3 | 582.6368 |
| Carbamidomethyl+C(10) | YVEPIEDVPCGNIVGLVGVDQFLVK  | 456 | 25 | 25.23  | 3 | 920.4889 |
|                       | FTDTR                      | 55  | 5  | 13.97  | 1 | 639.3062 |
|                       | IMGPNYTPGK                 | 428 | 10 | 28.84  | 2 | 539.2792 |
|                       | GEGQLGPAER                 | 239 | 10 | 28.84  | 2 | 507.2482 |
| Carbamidomethyl+C(8)  | DLEEDHACIPIK               | 559 | 12 | 31.29  | 3 | 480.5728 |
|                       | TGTITTFEHAHNMR             | 481 | 14 | 29.54  | 2 | 808.3984 |
|                       | EGIPALDNFLDK               | 845 | 12 | 47.47  | 2 | 666.3526 |
|                       | ANIRNMSVIAHVDHGK           | 16  | 16 | 37.83  | 2 | 881.4625 |
|                       | FSKSATSPEGK                | 272 | 11 | 39.35  | 2 | 569.7916 |
|                       | MVNFTVDQIRAIMDK            | 0   | 15 | 31.81  | 2 | 890.9479 |
|                       | GEGQLGPAERAK               | 239 | 12 | 28.07  | 3 | 404.8833 |

|                      |                      |        |                                           |                                |                  |        |        |          |          |          |
|----------------------|----------------------|--------|-------------------------------------------|--------------------------------|------------------|--------|--------|----------|----------|----------|
| P06733               | Alpha-enolase        |        | MSVIAHVDHGK                               | 21                             | 11               | 2.39   | 2      | 597.3089 |          |          |
|                      |                      |        | FSVSPVVR                                  | 498                            | 8                | 10.22  | 2      | 436.7515 |          |          |
|                      |                      |        | YISPDQLADLYK                              | 269                            | 12               | 102.38 | 2      | 713.3702 |          |          |
|                      |                      |        | IGAEVYHNLK                                | 183                            | 10               | 141.4  | 2      | 572.3166 |          |          |
|                      |                      |        | AAVPSGASTGIYEALELR                        | 32                             | 18               | 117.1  | 2      | 902.9858 |          |          |
|                      |                      |        | LAQANGWGVMSHR                             | 358                            | 14               | 125.28 | 3      | 509.2595 |          |          |
|                      |                      |        | TIAPALVSK                                 | 71                             | 9                | 65.19  | 2      | 450.2776 |          |          |
|                      |                      |        | Carbamidomethyl+C(2);Carbamidomethyl+C(4) | SCNCLLLK                       | 335              | 8      | 66.1   | 2        | 504.2566 |          |
|                      |                      |        |                                           | IEEELGSK                       | 412              | 8      | 70.87  | 2        | 452.734  |          |
|                      |                      |        |                                           | LMIEMDGTENK                    | 92               | 11     | 86.82  | 2        | 640.8031 |          |
|                      |                      |        |                                           | HIADLAGNSEVILPVPAFNVINGGSHAGNK | 132              | 30     | 105.02 | 4        | 753.6461 |          |
|                      |                      |        |                                           | GNPTVEVDLFTSK                  | 15               | 13     | 70.97  | 2        | 703.8688 |          |
|                      |                      |        | Carbamidomethyl+C(14)                     | VNQIGSVTESLQACK                | 343              | 15     | 78.72  | 2        | 817.4236 |          |
|                      |                      |        |                                           | LNVTEQEK                       | 81               | 8      | 56.9   | 2        | 480.7529 |          |
|                      |                      |        |                                           | DYPVVSIEDPFDQDDWGAWQK          | 285              | 21     | 66.36  | 3        | 837.3858 |          |
|                      |                      |        |                                           | VVIGMDVAASEFFR                 | 239              | 14     | 33.97  | 2        | 770.8988 |          |
|                      |                      |        |                                           | YNQLLR                         | 406              | 6      | 42.25  | 2        | 403.7253 |          |
|                      |                      |        |                                           | EGLELLK                        | 221              | 7      | 39.58  | 2        | 401.2388 |          |
|                      |                      |        |                                           | DATNVGDEGGFAPNILENK            | 202              | 19     | 32.28  | 2        | 980.98   |          |
|                      |                      |        |                                           | YDLDFK                         | 256              | 6      | 70.19  | 1        | 800.3879 |          |
|                      |                      |        |                                           | GLFR                           | 28               | 4      | 13.63  | 1        | 492.2922 |          |
|                      |                      |        |                                           | FTASAGIQVVGDDLTVTNPK           | 306              | 20     | 29.95  | 2        | 1017.048 |          |
|                      |                      |        |                                           | GVPLYR                         | 126              | 6      | 14.31  | 2        | 352.7101 |          |
|                      |                      |        |                                           | IDKLMIEMDGTENK                 | 89               | 14     | 20.97  | 2        | 818.8984 |          |
|                      |                      |        | Oxidation+M(10)                           | LAQANGWGVMSHR                  | 358              | 14     | 28.75  | 3        | 514.5971 |          |
|                      |                      |        |                                           | APALVSK                        | 73               | 7      | 24.53  | 1        | 685.4302 |          |
|                      |                      | P00338 | L-lactate dehydrogenase A chain           | Carbamidomethyl+C(6)           | VIGGCNLD SAR     | 157    | 12     | 83.2     | 2        | 624.8069 |
|                      |                      |        |                                           |                                | FIIPNVVK         | 118    | 8      | 80.07    | 2        | 465.2926 |
|                      |                      |        |                                           |                                | TLHPDLGTDKDKEQWK | 212    | 16     | 60.05    | 4        | 478.4933 |
|                      |                      |        |                                           |                                | LVITAGAR         | 90     | 9      | 96.14    | 2        | 457.2933 |
|                      |                      |        |                                           |                                | QVVESAYEVIK      | 232    | 11     | 59.34    | 2        | 632.8464 |
|                      |                      |        |                                           |                                | GEMMDLQHGSFLR    | 59     | 14     | 41.17    | 3        | 545.2655 |
| VTLTSEEEAR           | 305                  |        |                                           |                                | 10               | 54.57  | 2      | 567.7892 |          |          |
| VHPVSTMIK            | 269                  |        |                                           |                                | 9                | 48.21  | 2      | 506.2851 |          |          |
| DQLIYNLLK            | 5                    |        |                                           |                                | 9                | 96.14  | 2      | 560.3273 |          |          |
| Carbamidomethyl+C(9) | DDVFLSVPCLGQNGISDLVK |        |                                           |                                | 284              | 21     | 15.12  | 3        | 763.7368 |          |
|                      | DLADELALVDVIEDK      |        |                                           |                                | 42               | 15     | 121.51 | 2        | 829.44   |          |

|        |                                       |                       |                             |     |    |        |   |           |
|--------|---------------------------------------|-----------------------|-----------------------------|-----|----|--------|---|-----------|
|        |                                       |                       | LLIVSNPVDILTYVAWK           | 132 | 17 | 182.34 | 2 | 972.5775  |
|        |                                       |                       | LNLVQR                      | 106 | 6  | 56.22  | 2 | 371.7301  |
|        |                                       |                       | YLMGER                      | 171 | 6  | 42.25  | 2 | 384.6895  |
|        |                                       |                       | DYNTANSK                    | 81  | 9  | 32.48  | 2 | 506.2447  |
|        |                                       |                       | NVNIFK                      | 112 | 6  | 14.31  | 2 | 367.7152  |
|        |                                       |                       | SADTLWGIQK                  | 318 | 10 | 28.84  | 1 | 1118.5918 |
|        |                                       |                       | RVHPVSTMIK                  | 268 | 10 | 28.84  | 3 | 389.8923  |
|        |                                       |                       | LKGYTSWAIGLSVADLAESIMK      | 243 | 22 | 14.62  | 3 | 785.091   |
|        |                                       |                       | TLHPDLGTDKDK                | 212 | 12 | 24.09  | 2 | 670.3449  |
|        |                                       |                       | IVSGKDYNVTANSK              | 76  | 14 | 33.97  | 3 | 499.258   |
|        |                                       |                       | VLTSEEEAR                   | 305 | 10 | 28.84  | 2 | 607.7631  |
|        |                                       |                       | IITAGAR                     | 92  | 7  | 1.37   | 1 | 701.4343  |
|        |                                       |                       | MMDLQHGSFLR                 | 61  | 12 | 7.5    | 3 | 483.2456  |
|        |                                       |                       | GEMMDLQHGSFLR               | 59  | 14 | 7.5    | 3 | 539.2655  |
| P63104 | 14-3-3 protein zeta/delta             |                       | NLLSVAYK                    | 41  | 8  | 52.13  | 2 | 454.2662  |
|        |                                       |                       | DSTLIMQLLR                  | 212 | 10 | 122.66 | 2 | 595.3385  |
|        |                                       |                       | FLIPNASQAESK                | 103 | 12 | 24.09  | 2 | 652.8525  |
|        |                                       | Carbamidomethyl+C(3)  | DICNDVLSLEK                 | 91  | 12 | 31.29  | 2 | 709.8696  |
|        |                                       |                       | YLAEVAAGDDKK                | 127 | 12 | 47.48  | 3 | 427.2234  |
|        |                                       |                       | TAFDEAIAELDTLSEESYK         | 193 | 19 | 16.31  | 3 | 711.3392  |
| P08865 | 40S ribosomal protein SA              |                       | FAAATGATPIAGR               | 89  | 13 | 121.63 | 2 | 602.333   |
|        |                                       |                       | LLVVTDPK                    | 120 | 8  | 35.15  | 2 | 456.7812  |
|        |                                       |                       | AIVAIENPADVSVISSR           | 63  | 17 | 17.81  | 3 | 580.9821  |
|        |                                       |                       | GTISREHPWEVMPDLFYR          | 186 | 19 | 16.31  | 3 | 799.3851  |
|        |                                       | Carbamidomethyl+C(8)  | YVDIAIPCNNK                 | 155 | 11 | 26.18  | 2 | 653.8376  |
|        |                                       |                       | LLLAAR                      | 57  | 6  | 14.31  | 1 | 656.4525  |
|        |                                       |                       | KSDGIYIINLK                 | 41  | 11 | 29.19  | 2 | 632.3719  |
|        |                                       |                       | EEQAAAEEKAVTK               | 212 | 12 | 31.29  | 2 | 637.8332  |
|        |                                       |                       | FAAATGATPIAGR               | 89  | 13 | 29.87  | 3 | 428.5436  |
|        |                                       | Oxidation+M(10)       | MSGALDVLQMK                 | 0   | 11 | 26.18  | 2 | 604.8106  |
| P62937 | Peptidyl-prolyl cis-trans isomerase A |                       | FEDENFILK                   | 82  | 9  | 63.43  | 2 | 577.7923  |
|        |                                       |                       | EGMNIVEAMER                 | 133 | 11 | 59.34  | 2 | 639.7997  |
|        |                                       |                       | VSFELFADK                   | 19  | 9  | 108.35 | 2 | 528.2759  |
|        |                                       | Carbamidomethyl+C(7)  | IIPGFMCQGGDFTR              | 55  | 14 | 45.6   | 2 | 799.8835  |
|        |                                       |                       | TEWLDGK                     | 118 | 7  | 42.59  | 2 | 424.711   |
|        |                                       | Carbamidomethyl+C(24) | HTGPGILSMANAGPNTNGSQFFICTAK | 91  | 27 | 16.94  | 3 | 931.1229  |
|        |                                       |                       | VKEGMNIVEAMER               | 131 | 13 | 34.81  | 3 | 502.5882  |

|        |                           |                      |                           |                 |          |        |       |           |          |
|--------|---------------------------|----------------------|---------------------------|-----------------|----------|--------|-------|-----------|----------|
| P37802 | Transgelin-2              | Carbamidomethyl+C(7) | VNPTVFFDIAVDGEPLGR        | 1               | 18       | 99.16  | 2     | 973.5177  |          |
|        |                           |                      | VSFELFADKVPK              | 19              | 12       | 96.36  | 3     | 460.5875  |          |
|        |                           |                      | SIYGEKFEDENFILK           | 76              | 15       | 39.08  | 3     | 611.3112  |          |
|        |                           |                      | KITIADCGQLE               | 154             | 11       | 33.16  | 2     | 624.3216  |          |
|        |                           |                      | VKEGMNIVEAMER             | 131             | 13       | 22.39  | 3     | 502.5901  |          |
|        |                           |                      | EGMNIVEAMERFGSR           | 133             | 15       | 39.08  | 2     | 863.4146  |          |
|        |                           |                      | TLMNLGGLAVAR              | 127             | 12       | 119.66 | 2     | 608.3517  |          |
|        |                           |                      | IQASTMAFK                 | 79              | 9        | 57.24  | 2     | 498.7663  |          |
|        |                           |                      | NVIGLQMGTR                | 171             | 11       | 29.19  | 2     | 601.8136  |          |
|        |                           |                      | GPAYGLSREVQQK             | 4               | 13       | 36.86  | 2     | 716.8741  |          |
|        |                           |                      | NFSDNQLQEGK               | 160             | 11       | 26.18  | 2     | 640.3101  |          |
|        |                           |                      | GASQAGMTGYGMPR            | 182             | 14       | 64.34  | 2     | 692.3201  |          |
|        |                           |                      | DDGLFSGDPNWFPK            | 139             | 14       | 42.22  | 2     | 797.8744  |          |
|        |                           |                      | QMEQISQFLQAAER            | 88              | 14       | 35.45  | 2     | 839.9287  |          |
| P29401 | Transketolase             | Carbamidomethyl+C(5) | YGINTTDIFQTVDLWEGK        | 102             | 18       | 71.81  | 2     | 1050.5348 |          |
|        |                           |                      | VLDPFTIKPLDR              | 530             | 12       | 88.71  | 3     | 471.9379  |          |
|        |                           |                      | MPSLPSYK                  | 302             | 8        | 52.13  | 2     | 461.7409  |          |
|        |                           |                      | ISSDLDGHPVPK              | 102             | 12       | 24.09  | 3     | 422.2212  |          |
|        |                           |                      | IILDGDTK                  | 334             | 9        | 57.24  | 2     | 473.2692  |          |
|        |                           |                      | HQPTAIIAK                 | 232             | 9        | 55.99  | 2     | 489.7886  |          |
|        |                           |                      | NMAEQIIQEIYSQIQSK         | 264             | 17       | 117.06 | 3     | 675.0129  |          |
|        |                           |                      | LDNLVAILDINR              | 174             | 12       | 118.11 | 2     | 684.9026  |          |
|        |                           |                      | TSRPENAIHYNNNEDFQVGQAK    | 471             | 22       | 14.62  | 3     | 836.749   |          |
|        |                           |                      | NSTFSEIFK                 | 343             | 9        | 40.26  | 2     | 536.7747  |          |
|        |                           |                      | LGQSDPAPLQHQMDIYQK        | 186             | 18       | 27     | 3     | 690.3427  |          |
|        |                           |                      | ILATPPQEDAPSVDIANIR       | 283             | 19       | 51.57  | 2     | 1010.5544 |          |
|        |                           |                      | Carbamidomethyl+C(3)      | TVPFCS'TFAAFFTR | 381      | 14     | 51.62 | 2         | 826.4134 |
|        |                           |                      | SGKPAELLK                 | 594             | 9        | 32.48  | 2     | 471.7878  |          |
| MFGIDR | 603                       | 6                    | 28.28                     | 2               | 369.6854 |        |       |           |          |
| P00558 | Phosphoglycerate kinase 1 | Carbamidomethyl+C(3) | GICFIR                    | 465             | 6        | 14.31  | 2     | 383.2093  |          |
|        |                           |                      | GHAAPILYAVWAEAGFLAEALLNLR | 75              | 26       | 19.96  | 3     | 932.5028  |          |
|        |                           |                      | LGHASDRIIALDGDGDK         | 327             | 16       | 29.98  | 3     | 561.2993  |          |
|        |                           |                      | DPFTIKPLDR                | 532             | 10       | 22.55  | 2     | 601.3366  |          |
|        |                           |                      | PSLPSYK                   | 303             | 7        | 1.02   | 2     | 396.2229  |          |
|        |                           |                      | LGDVVYVNDAFGTAHR          | 156             | 15       | 76.73  | 3     | 545.6041  |          |
|        |                           |                      | ALESPERPFLAILGGAK         | 199             | 17       | 96.55  | 3     | 590.337   |          |
|        |                           |                      | VDFNVPMK                  | 22              | 8        | 80.07  | 2     | 475.2458  |          |

|        |                                            |                       |                                |        |       |          |          |          |
|--------|--------------------------------------------|-----------------------|--------------------------------|--------|-------|----------|----------|----------|
| P04406 | Glyceraldehyde-3-phosphate dehydrogenase   | Carbamidomethyl+C(2)  | FCLDNGAK                       | 48     | 8     | 52.13    | 2        | 462.7209 |
|        |                                            |                       | IQLINNMLDK                     | 220    | 10    | 42.81    | 2        | 601.339  |
|        |                                            |                       | AHSSMVGVNLPQK                  | 171    | 13    | 83.7     | 3        | 456.5775 |
|        |                                            | Carbamidomethyl+C(2)  | ACANPAAGSVILLENLR              | 106    | 17    | 78.24    | 2        | 884.9825 |
|        |                                            |                       | VNEMIIGGGMAFTFLK               | 230    | 16    | 26.57    | 2        | 864.4474 |
|        |                                            |                       | YSLEPVAVELK                    | 75     | 11    | 73.82    | 2        | 624.3552 |
|        |                                            | Carbamidomethyl+C(2)  | DCVGPEVEK                      | 97     | 9     | 40.26    | 2        | 516.7434 |
|        |                                            |                       | VLNNMEIGTSLFDEEGAK             | 246    | 18    | 40.77    | 2        | 983.9897 |
|        |                                            |                       | FHVEEEGK                       | 123    | 8     | 38.16    | 2        | 487.7393 |
|        |                                            |                       | VSHVSTGGGASLELLEK              | 388    | 18    | 17.01    | 2        | 870.954  |
|        |                                            |                       | ITLPVDFVTADKFDENAK             | 279    | 18    | 70.77    | 3        | 675.0198 |
|        |                                            |                       | SVVLMShLGRPDGVPMPDKYSLEPVAVELK | 56     | 30    | 12.06    | 5        | 653.5496 |
|        |                                            |                       | AEPAKIEAFR                     | 141    | 10    | 28.84    | 2        | 566.3054 |
|        |                                            |                       | GVNLPQK                        | 177    | 7     | 2.73     | 1        | 755.4437 |
|        |                                            |                       | VIISAPSADAPMFVMGVNHEK          | 118    | 21    | 277.61   | 3        | 738.3743 |
|        |                                            | Carbamidomethyl+C(13) | VPTANVSVDLTCR                  | 234    | 14    | 162.25   | 2        | 765.9042 |
|        |                                            |                       | GALQNIIPASTGAAK                | 200    | 15    | 150.04   | 2        | 706.4031 |
|        |                                            |                       | VIHDNFGIVEGLMTTVHAIATQK        | 162    | 24    | 264.83   | 4        | 649.5957 |
|        |                                            |                       | LTGMAFR                        | 227    | 7     | 42.59    | 2        | 398.2095 |
|        | Carbamidomethyl+C(7);Carbamidomethyl+C(11) | IISNASCTINCLAPLAK     | 145                            | 17     | 141.4 | 2        | 917.4684 |          |
|        | VVDLMAHMASKE                               | 323                   | 12                             | 83.2   | 3     | 444.2193 |          |          |
|        | LVINGNPITIFQERDPSK                         | 66                    | 18                             | 37.58  | 3     | 681.0447 |          |          |
|        | VVDLMAHMASK                                | 323                   | 11                             | 103.8  | 3     | 401.2022 |          |          |
|        | LISWYDNEFGYSNR                             | 309                   | 14                             | 125.28 | 2     | 882.4152 |          |          |
|        | RVIISAPSADAPMFVMGVNHEK                     | 117                   | 22                             | 105.84 | 3     | 790.4118 |          |          |
|        | VEGLMTTVHAIATQK                            | 170                   | 16                             | 7.67   | 3     | 567.304  |          |          |
|        | LTGMAFR                                    | 227                   | 7                              | 0.68   | 2     | 389.2081 |          |          |
|        | Carbamidomethyl+C(13)                      | VPTANVSVDLTCR         | 234                            | 14     | 3.07  | 2        | 756.8874 |          |
| P12814 | Alpha-actinin-1                            |                       | LASDLEWIR                      | 281    | 10    | 107.44   | 2        | 608.3461 |
|        |                                            |                       | VGWEQLLTTIAR                   | 714    | 12    | 34.3     | 2        | 693.8983 |
|        |                                            |                       | HTNYTMEHIR                     | 704    | 10    | 35.83    | 3        | 434.539  |
|        |                                            |                       | DLLDPAWEK                      | 21     | 10    | 28.84    | 2        | 600.3229 |
|        |                                            |                       | FAIQDISVEETSAK                 | 133    | 14    | 26.41    | 3        | 513.2572 |
|        |                                            |                       | LAKPER                         | 76     | 6     | 31.29    | 2        | 357.2188 |
|        |                                            |                       | NVNIQNFHISWK                   | 162    | 12    | 34.3     | 3        | 500.5915 |
|        |                                            |                       | DDPLTNLNTAFDVAEK               | 198    | 16    | 33.1     | 3        | 588.2885 |
|        |                                            |                       | LGVVTFQAFIDFMSR                | 803    | 15    | 27.84    | 3        | 577.627  |

|                       |                           |                                       |                                    |                      |                               |          |       |           |          |           |
|-----------------------|---------------------------|---------------------------------------|------------------------------------|----------------------|-------------------------------|----------|-------|-----------|----------|-----------|
| P23528                | Cofilin-1                 | Carbamidomethyl+C(6)                  | VEQIAAIAQELNELDYYDSPSVNAR          | 450                  | 25                            | 13.4     | 3     | 936.8013  |          |           |
|                       |                           |                                       | DGLGFCALIHRRRPELIDYGK              | 174                  | 21                            | 23.57    | 3     | 823.0893  |          |           |
|                       |                           | Carbamidomethyl+C(5)                  | ILAGDKNYITMDELK                    | 834                  | 15                            | 19.76    | 2     | 876.454   |          |           |
|                       |                           |                                       | AVLFCLSEDKK                        | 34                   | 11                            | 75.07    | 3     | 437.2289  |          |           |
|                       |                           | Carbamidomethyl+C(7)                  | MLPDKDCR                           | 73                   | 8                             | 56.9     | 2     | 517.746   |          |           |
|                       |                           | Q9BUF5                                | Tubulin beta-6 chain               | Carbamidomethyl+C(5) | NIILEEGKEILVGDVGGQTVDDPYATFVK | 45       | 28    | 28.39     | 3        | 1021.5464 |
|                       |                           |                                       |                                    |                      | LGGSAVISLEGKPL                | 152      | 14    | 20.97     | 2        | 670.8978  |
|                       |                           |                                       |                                    | Carbamidomethyl+C(6) | KEDLVFIFWAPESAPLK             | 95       | 17    | 37        | 3        | 664.0311  |
|                       |                           |                                       |                                    |                      | YALYDATYETK                   | 81       | 11    | 69.05     | 2        | 669.3244  |
|                       |                           |                                       |                                    | Carbamidomethyl+C(5) | VFNDMK                        | 13       | 6     | 31.29     | 2        | 377.1863  |
| EILVGDVGGQTVDDPYATFVK | 53                        |                                       |                                    |                      | 20                            | 21.82    | 3     | 722.7045  |          |           |
| Carbamidomethyl+C(6)  | SKMIYASSK                 |                                       |                                    | 112                  | 9                             | 40.26    | 2     | 507.7645  |          |           |
|                       | AVLFCLSEDKK               |                                       |                                    | 34                   | 11                            | 26.18    | 3     | 437.2351  |          |           |
| P60174                | Triosephosphate isomerase |                                       |                                    | Carbamidomethyl+C(6) | LAVNMVFPFR                    | 252      | 10    | 141.4     | 2        | 572.323   |
|                       |                           |                                       |                                    |                      | LHFFMPGFAPLTSR                | 262      | 14    | 204.83    | 3        | 540.9483  |
|                       |                           | Carbamidomethyl+C(12)                 | NMMAACDPR                          | 297                  | 9                             | 47.7     | 2     | 533.2217  |          |           |
|                       |                           |                                       | MASTFIGNSTAIQELFK                  | 362                  | 17                            | 29.64    | 2     | 929.4894  |          |           |
|                       |                           | Carbamidomethyl+C(2)                  | YLTVATVFRGPMSMK                    | 309                  | 15                            | 19.76    | 3     | 567.6361  |          |           |
|                       |                           |                                       | TATPQQAQEVHEK                      | 175                  | 13                            | 143.38   | 3     | 489.5756  |          |           |
|                       |                           | Carbamidomethyl+C(12)                 | DCGATWVVLGHSER                     | 85                   | 14                            | 45.6     | 3     | 529.5858  |          |           |
|                       |                           |                                       | VVLAYEPVWAIGTGK                    | 160                  | 15                            | 184.21   | 2     | 801.9563  |          |           |
|                       |                           | Carbamidomethyl+C(9)                  | ELASQPDVDGFLVGGASLKPEFVDIINAK      | 219                  | 29                            | 36.68    | 3     | 1010.5411 |          |           |
|                       |                           |                                       | IYGGSVTGATCK                       | 206                  | 13                            | 27.16    | 2     | 663.8485  |          |           |
| P07437                | Tubulin beta chain        | Carbamidomethyl+C(9)                  | QSLGELIGTLNAAK                     | 19                   | 14                            | 44.18    | 2     | 707.9077  |          |           |
|                       |                           |                                       | VPADTEVVCAPPTAYIDFAR               | 33                   | 20                            | 27.31    | 2     | 1096.5559 |          |           |
|                       |                           | Carbamidomethyl+C(2)                  | DCGATWVVLGHSEK                     | 85                   | 15                            | 19.76    | 3     | 581.6184  |          |           |
|                       |                           |                                       | QSLGELIGTLNAAKVPADTEVVCAPPTAYIDFAR | 19                   | 34                            | 16.49    | 4     | 897.7055  |          |           |
|                       |                           | Carbamidomethyl+C(23)                 | FFVGGNWKMNKR                       | 6                    | 12                            | 24.09    | 2     | 706.8412  |          |           |
|                       |                           |                                       | VTNGAFTGEISPGMIKDCGATWVVLGHSER     | 69                   | 30                            | 17.95    | 5     | 641.919   |          |           |
|                       |                           | Carbamidomethyl+C(18);Oxidation+M(14) | Oxidation+M(14)                    | VTNGAFTGEISPGMIK     | 69                            | 16       | 18.72 | 3         | 546.6174 |           |
|                       |                           |                                       | TATPQQAQEVHEK                      | 175                  | 13                            | 2.73     | 3     | 483.5759  |          |           |
|                       |                           | Carbamidomethyl+C(23)                 | LAVNMVFPFR                         | 252                  | 10                            | 141.4    | 2     | 572.323   |          |           |
|                       |                           |                                       | IMNTFSVVPSPK                       | 162                  | 12                            | 146.05   | 2     | 660.3597  |          |           |
| Carbamidomethyl+C(23) | LHFFMPGFAPLTSR            | 262                                   | 14                                 | 204.83               | 3                             | 540.9483 |       |           |          |           |
|                       | GHYTEGAELVDSVLDVVR        | 103                                   | 18                                 | 118.35               | 3                             | 653.6672 |       |           |          |           |
| Carbamidomethyl+C(23) | LTTPTYGDLNHLVSATMSGVTTCLR | 216                                   | 25                                 | 153.05               | 3                             | 903.4569 |       |           |          |           |
|                       | ISEQFTAMFR                | 380                                   | 10                                 | 78.53                | 2                             | 615.3081 |       |           |          |           |

|                      |                               |                                           |                                  |       |       |          |          |           |
|----------------------|-------------------------------|-------------------------------------------|----------------------------------|-------|-------|----------|----------|-----------|
| P00966               | Argininosuccinate synthase    | YLTVAAVFR                                 | 309                              | 9     | 79.16 | 2        | 520.3008 |           |
|                      |                               | Carbamidomethyl+C(6)                      | NMMAACDPR                        | 297   | 9     | 47.7     | 2        | 533.2217  |
|                      |                               |                                           | IREEYPDR                         | 154   | 8     | 78.65    | 2        | 539.2682  |
|                      |                               |                                           | AILVDLEPGTMDSVR                  | 62    | 15    | 113.12   | 2        | 808.4295  |
|                      |                               | Carbamidomethyl+C(10)                     | EIVHIQAGQCGNQIGAK                | 2     | 17    | 35.75    | 3        | 608.316   |
|                      |                               |                                           | FWEVISDEHGIDPTGTYHGDSDLQLDR      | 19    | 27    | 29.3     | 4        | 776.3609  |
|                      |                               | Carbamidomethyl+C(5);Carbamidomethyl+C(7) | EAESCDCQLQGFQLTHSLGGGTGSGMGTLISK | 122   | 32    | 11.69    | 3        | 1104.5268 |
|                      |                               |                                           | EVDEQMLNVQNK                     | 324   | 12    | 78.42    | 2        | 723.8573  |
|                      |                               |                                           | NSSYFVEWIPNNVK                   | 336   | 14    | 186.09   | 2        | 848.9302  |
|                      |                               | Carbamidomethyl+C(4)                      | ISVYYNEATGGK                     | 46    | 12    | 105.69   | 2        | 651.33    |
|                      |                               |                                           | TAVCDIPRGLK                      | 350   | 12    | 24.09    | 2        | 663.862   |
|                      |                               |                                           | ISEQFTAMFRR                      | 380   | 11    | 26.18    | 3        | 462.5696  |
|                      |                               |                                           | GLKMAVTFIGNSTAIQELFK             | 359   | 20    | 24.67    | 3        | 723.3969  |
|                      |                               |                                           | RISEQFTAMFR                      | 379   | 11    | 29.19    | 3        | 462.5688  |
|                      |                               | Carbamidomethyl+C(23);Oxidation+M()       | LTTPTYGDLNHLVSATMSGVTTCLR        | 216   | 25    | 13.4     | 3        | 908.786   |
|                      |                               |                                           | TVAAVFR                          | 311   | 7     | 1.37     | 1        | 763.4442  |
|                      |                               |                                           | MPEFYNR                          | 146   | 7     | 42.59    | 2        | 478.7227  |
|                      |                               | Carbamidomethyl+C(5)                      | FELSCYSLAPQIK                    | 127   | 13    | 90.68    | 2        | 778.4037  |
|                      |                               |                                           | APNTPDILEIEFKK                   | 215   | 14    | 26.41    | 3        | 538.9632  |
|                      |                               |                                           | VFIEDVSR                         | 58    | 8     | 35.15    | 2        | 482.76    |
|                      |                               |                                           | EFVEEFIWPAIQSSALYEDR             | 66    | 20    | 33.45    | 3        | 810.3997  |
|                      |                               |                                           | DGTTHTQTSLELFMYLNEVAGK           | 239   | 21    | 15.12    | 3        | 785.3879  |
|                      |                               |                                           | IDIVENR                          | 265   | 7     | 42.59    | 2        | 429.7398  |
|                      |                               | Carbamidomethyl+C(15)                     | GSVVLAYSGGLDTSCILVWLK            | 4     | 21    | 48.3     | 4        | 560.3028  |
|                      |                               |                                           | VIAPWR                           | 140   | 6     | 31.29    | 2        | 371.2238  |
|                      |                               | Carbamidomethyl+C(11)                     | YLLGTSLARPCAR                    | 86    | 14    | 28.75    | 3        | 530.9656  |
|                      |                               |                                           | YVSHGATGK                        | 112   | 9     | 40.26    | 2        | 460.2419  |
|                      | GIYETPAGTILYHAHLIDIEAFTMDR    | 279                                       | 25                               | 19.62 | 3     | 945.4799 |          |           |
|                      | EQGYDVIAYLANIGQK              | 25                                        | 16                               | 27.09 | 3     | 594.6406 |          |           |
| Oxidation+M(23)      | GIYETPAGTILYHAHLIDIEAFTMDREVR | 279                                       | 28                               | 12.51 | 4     | 809.4008 |          |           |
|                      | VAPVPLYSFHDVYK                | 434                                       | 15                               | 55.44 | 3     | 583.6409 |          |           |
| Carbamidomethyl+C(8) | LQLIPGVCGFR                   | 319                                       | 11                               | 29.19 | 2     | 630.3551 |          |           |
|                      | YLNAGAGGIAGAFIHEK             | 276                                       | 17                               | 17.81 | 3     | 563.6363 |          |           |
|                      | DVFQELEK                      | 412                                       | 8                                | 35.15 | 2     | 504.2593 |          |           |
|                      | ILLEAK                        | 157                                       | 6                                | 42.25 | 2     | 343.7297 |          |           |
|                      | FTNLLTSILDSAETK               | 449                                       | 15                               | 40.22 | 2     | 826.9496 |          |           |
|                      | EPSSLELPADTVQR                | 1                                         | 14                               | 26.41 | 3     | 514.6034 |          |           |
| Q16719               | Kynureninase                  |                                           |                                  |       |       |          |          |           |

|        |                                  |                        |                                           |                          |       |        |           |          |          |
|--------|----------------------------------|------------------------|-------------------------------------------|--------------------------|-------|--------|-----------|----------|----------|
| P10599 | Thioredoxin                      |                        | VALHLDEEDKLR                              | 28                       | 12    | 47.47  | 3         | 479.9282 |          |
|        |                                  |                        | PVPLYNSFHDVYK                             | 436                      | 13    | 7.38   | 3         | 526.9386 |          |
|        |                                  |                        | YLNAGAGGIAGAFIHEK                         | 276                      | 17    | 4.1    | 3         | 557.625  |          |
|        |                                  |                        | TAFQEALDAAGDK                             | 8                        | 13    | 110.67 | 2         | 668.8302 |          |
|        |                                  |                        | VGEFSGANK                                 | 85                       | 9     | 71.21  | 2         | 454.7261 |          |
|        |                                  | Carbamidomethyl+C(1)   | CMPTFQFFK                                 | 72                       | 9     | 60.25  | 2         | 603.283  |          |
|        |                                  | Oxidation+M(1)         | MIKPFHSLSEK                               | 36                       | 12    | 24.09  | 2         | 740.3808 |          |
| P07197 | Neurofilament medium polypeptide |                        | GEFSGANK                                  | 86                       | 8     | 1.37   | 1         | 809.3828 |          |
|        |                                  |                        | EYQDLLNVK                                 | 382                      | 9     | 80.41  | 2         | 561.3009 |          |
|        |                                  |                        | SYTLDSLGNPSAYR                            | 1                        | 14    | 33.97  | 3         | 515.2541 |          |
|        |                                  |                        | QLSDIEER                                  | 343                      | 8     | 35.15  | 2         | 495.2467 |          |
|        |                                  |                        | FVEEIIETK                                 | 451                      | 10    | 28.84  | 3         | 412.8868 |          |
|        |                                  |                        | EAAEEK                                    | 489                      | 6     | 14.31  | 1         | 676.3139 |          |
|        |                                  |                        | EIEAEIQALR                                | 127                      | 10    | 28.84  | 2         | 586.3207 |          |
|        |                                  |                        | EDIAVNGEVEGK                              | 797                      | 12    | 28.07  | 3         | 420.5464 |          |
|        |                                  |                        | SPVPKSPVEEAK                              | 679                      | 12    | 24.09  | 3         | 423.2347 |          |
|        |                                  |                        | KEDIAVNGEVEGK                             | 796                      | 13    | 27.16  | 3         | 463.2372 |          |
|        |                                  |                        | SSFSRVSGSPSSGFR                           | 21                       | 15    | 19.76  | 3         | 515.5812 |          |
|        |                                  |                        | EEGKPLQKEKEK                              | 762                      | 12    | 24.09  | 3         | 481.5872 |          |
|        |                                  |                        | ATAPEVKEEEGEK                             | 514                      | 13    | 22.39  | 3         | 472.8971 |          |
|        |                                  |                        | ESLERQLSDIEER                             | 338                      | 13    | 31.63  | 2         | 802.4042 |          |
| P09601 | Heme oxygenase 1                 |                        | AALEQDLAFWYGPR                            | 86                       | 14    | 30.01  | 3         | 546.2782 |          |
|        |                                  |                        | VQDSAPVETPR                               | 243                      | 11    | 29.19  | 2         | 599.8102 |          |
|        |                                  |                        | ESPVFAPVYFPEELHR                          | 69                       | 16    | 69.79  | 3         | 639.6614 |          |
|        |                                  |                        | ALDLPSSGEGLAFFTFPNIASATK                  | 153                      | 24    | 25.23  | 3         | 818.7531 |          |
|        |                                  |                        | LVMASLYHIYVALEEEIER                       | 48                       | 19    | 16.31  | 4         | 570.3039 |          |
|        |                                  |                        | TEPELLVAHAYTR                             | 123                      | 13    | 22.39  | 2         | 750.4045 |          |
|        |                                  |                        | PVFAPVYFPEELHR                            | 71                       | 14    | 7.31   | 3         | 567.6265 |          |
| O00410 | Importin-5                       |                        | ATAAFILANEHNVALFK                         | 195                      | 17    | 18.59  | 3         | 610.6715 |          |
|        |                                  |                        | ITFLLQAIR                                 | 41                       | 9     | 72.95  | 2         | 537.8423 |          |
|        |                                  |                        | LMVPLLK                                   | 705                      | 7     | 43.64  | 2         | 407.2685 |          |
|        |                                  |                        | ENVNATENCISAVGK                           | 963                      | 15    | 20.59  | 2         | 803.38   |          |
|        |                                  |                        | QAEETYENIPGQSK                            | 27                       | 14    | 29.61  | 3         | 531.9225 |          |
|        |                                  |                        | FLFDSVSSQNVGLR                            | 134                      | 14    | 59.62  | 2         | 784.9037 |          |
|        |                                  |                        | Carbamidomethyl+C(1);Carbamidomethyl+C(9) | CIEVMGDGCLNNEHFEEELGGILK | 775   | 23     | 36.63     | 3        | 878.7366 |
|        |                                  |                        |                                           | SLLIPYLDNLVK             | 475   | 12     | 25        | 2        | 694.4116 |
|        |                                  | LLSSAFDEVYPALPSDVQTAIK | 68                                        | 22                       | 50.99 | 2      | 1182.6341 |          |          |

|        |                                              |                       |                         |      |    |       |   |           |
|--------|----------------------------------------------|-----------------------|-------------------------|------|----|-------|---|-----------|
|        |                                              | Carbamidomethyl+C(5)  | MLVQCMQDQEHSIR          | 175  | 15 | 20.59 | 3 | 624.6237  |
|        |                                              | Carbamidomethyl+C(4)  | YAACNAVGMATDFAPGFQK     | 416  | 20 | 25.8  | 3 | 716.3366  |
|        |                                              | Carbamidomethyl+C(13) | VAAAESMPLLECAR          | 720  | 15 | 20.59 | 3 | 544.2761  |
|        |                                              |                       | EGFVEYTEQVVK            | 693  | 12 | 25    | 3 | 476.5789  |
|        |                                              | Carbamidomethyl+C(16) | VQAHAAAALNFTEDCPK       | 457  | 18 | 54.96 | 2 | 978.4928  |
|        |                                              |                       | IFSIIAEGEMHEAIK         | 1037 | 15 | 20.59 | 3 | 563.2962  |
|        |                                              |                       | EHIMQMLQNPDKYR          | 360  | 15 | 20.59 | 3 | 663.6532  |
|        |                                              | Carbamidomethyl+C(11) | TKENVNATENCISAVGK       | 961  | 17 | 25.58 | 2 | 917.9452  |
|        |                                              |                       | QLALEVIVTLSETAAAMLK     | 276  | 20 | 49.46 | 3 | 746.3925  |
| P13804 | Electron transfer flavoprotein subunit alpha |                       | LEVAPISDIIAIK           | 126  | 13 | 28.05 | 2 | 691.4251  |
|        |                                              | Carbamidomethyl+C(9)  | TIYAGNALCTVK            | 146  | 12 | 25    | 2 | 655.8495  |
|        |                                              |                       | GLLPEELTPLLATQK         | 85   | 16 | 19.53 | 2 | 868.5216  |
|        |                                              |                       | ASSTSPVEISEWLDQK        | 187  | 16 | 19.53 | 3 | 592.955   |
|        |                                              | Carbamidomethyl+C(7)  | LGGEVSVCLVAGTK          | 46   | 13 | 33.42 | 2 | 645.8365  |
|        |                                              |                       | LLYDLADQLHAAVGASR       | 232  | 17 | 18.59 | 3 | 604.995   |
|        |                                              |                       | AAVDAGFVPMNDMQVGTGK     | 249  | 19 | 26.21 | 3 | 635.6345  |
|        |                                              | Oxidation+M(5)        | VVPEMTEILK              | 321  | 10 | 31.58 | 2 | 587.8189  |
| P62158 | Calmodulin                                   |                       | EAFSLFDKDGDTITTK        | 14   | 17 | 71.89 | 3 | 615.6395  |
|        |                                              |                       | VFDKDGNGYISAAELR        | 91   | 16 | 46.58 | 3 | 585.6338  |
|        |                                              |                       | MADQLTEEQIAEFK          | 0    | 14 | 29.61 | 3 | 551.5949  |
| P30086 | Phosphatidylethanolamine-binding protein 1   |                       | NRPTSISWDGLDSGK         | 47   | 15 | 64.19 | 3 | 544.9424  |
|        |                                              |                       | YVWLVYEQDRPLK           | 119  | 13 | 32.52 | 3 | 570.3103  |
|        |                                              |                       | VLTPTQVK                | 39   | 8  | 58.3  | 2 | 443.2748  |
|        |                                              |                       | LYEQLSGK                | 179  | 8  | 36.18 | 2 | 469.2603  |
|        |                                              |                       | GNDISSGTVLSDYVGSPPK     | 93   | 20 | 33.87 | 2 | 975.4923  |
|        |                                              |                       | LYTLVLTDPDAPSR          | 62   | 14 | 30.4  | 2 | 780.9051  |
|        |                                              |                       | EWHHFLVVNMK             | 82   | 11 | 27.12 | 2 | 720.354   |
|        |                                              | Oxidation+M(12)       | YREWHHFLVVNMK           | 80   | 13 | 23.28 | 3 | 592.3021  |
| P08708 | 40S ribosomal protein S17                    |                       | IAGYVTHLMK              | 49   | 10 | 36.81 | 2 | 566.8108  |
|        |                                              |                       | LLDFGSLSNLQVTQPTVGMNFK  | 107  | 22 | 59.66 | 3 | 803.7605  |
|        |                                              |                       | RDNYVPEVSALDQEIIIVDPDTK | 80   | 23 | 14.78 | 3 | 882.4459  |
|        |                                              |                       | LQEEER                  | 72   | 6  | 14.65 | 2 | 402.1956  |
|        |                                              |                       | DNYVPEVSALDQEIIIVDPDTK  | 81   | 22 | 15.26 | 2 | 1245.1175 |
|        |                                              |                       | IAGYVTHLMKR             | 49   | 11 | 27.12 | 2 | 644.8631  |
|        |                                              |                       | YYTRLGNDFHTNK           | 19   | 13 | 23.28 | 3 | 543.5965  |
