# Supplementary figures and images for: Shotgun proteomics and network analysis of neuroblastoma cell lines treated with curcumin
Source: Royal Society of Chemistry journal article supplement (doi:10.1039/c2mb05498a), 2012-01-17

**A Data quality WT experiment**

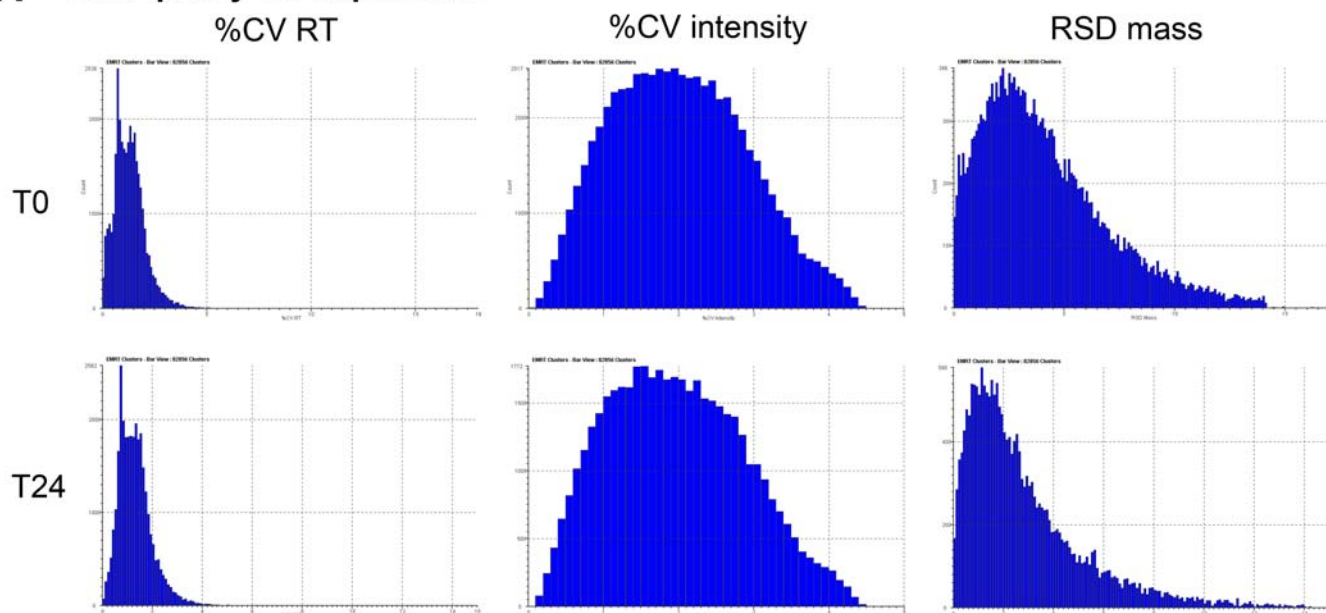

**B Data quality DDP experiment**

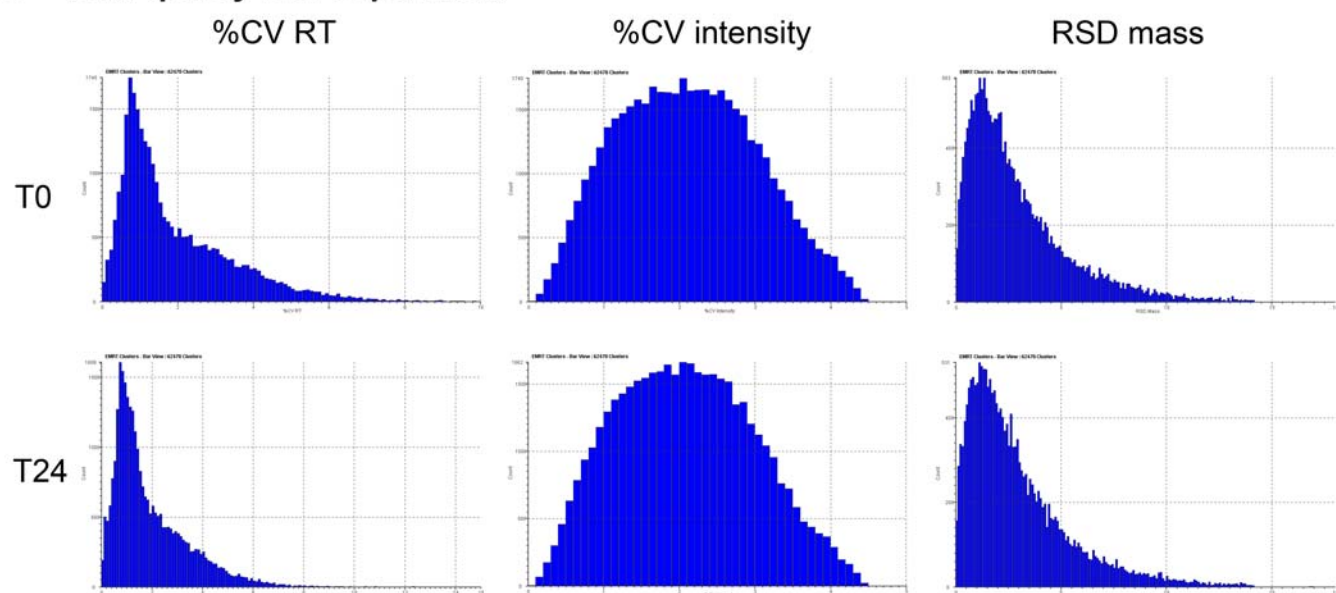

Supplement: c2mb05498a.pdf [file c2mb05498a.pdf]
